# Supplementary material for: Analysis of Tumor-Associated AXIN1 Missense Mutations Identifies Variants That Activate β-Catenin Signaling
Source: PubMed Central journal article supplement — Cancer Res. 2024 Feb 15;84(9):1443–59. doi: 10.1158/0008-5472.CAN-23-2268 (PMC11063763; doi:10.1158/0008-5472.can-23-2268), 2024-02-15

## Supplemental Data 1: Original western blot images

Fig. 1B

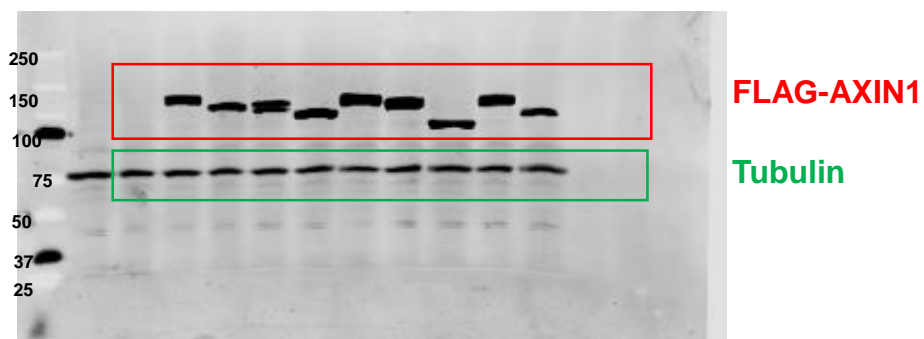

| Lane | loading           |                |
|------|-------------------|----------------|
| 1    | Marker            |                |
| 2    | No                |                |
| 3    | Ev                |                |
| 4    | WT                |                |
| 5    | Tankyrase         | Deleted domain |
| 6    | APC/RGS 81-212del |                |
| 7    | MEKK1             |                |
| 8    | GSK3 $\beta$      |                |
| 9    | $\beta$ -catenin  |                |
| 10   | CK1               |                |
| 11   | PP2Ac             |                |
| 12   | DVL/DIX           |                |

**Fig. 2A**

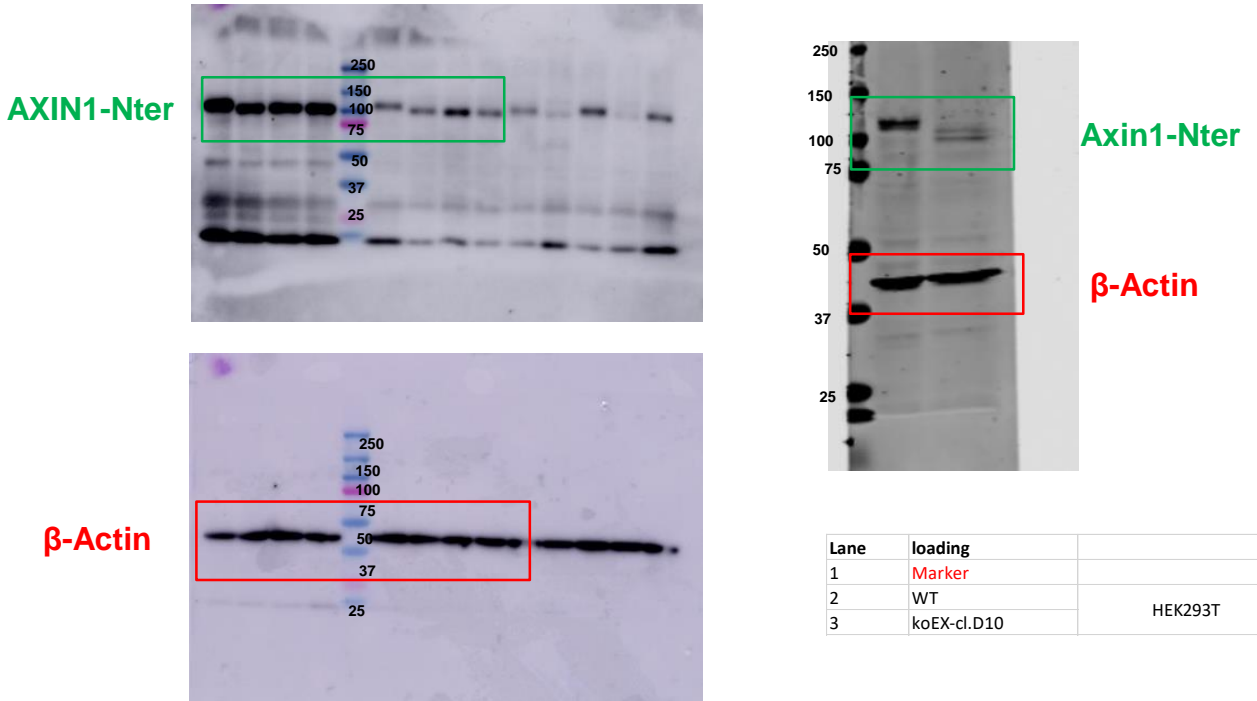

| Lane | loading     |         |
|------|-------------|---------|
| 1    | Marker      |         |
| 2    | WT          | HEK293T |
| 3    | koEX-cl.D10 |         |

| Lane | loading     |                       |
|------|-------------|-----------------------|
| 1    | WT          | HEK293T               |
| 2    | koEX5-cl,33 |                       |
| 3    | koEX-cl,36  |                       |
| 4    | koEX-cl,43  |                       |
| 5    | Marker      |                       |
| 6    | WT          | SNU449 AXIN1-repaired |
| 7    | koEX5-cl.08 |                       |
| 8    | koEX5-cl.09 |                       |
| 9    | koEX5-cl.18 |                       |

Fig. 3C

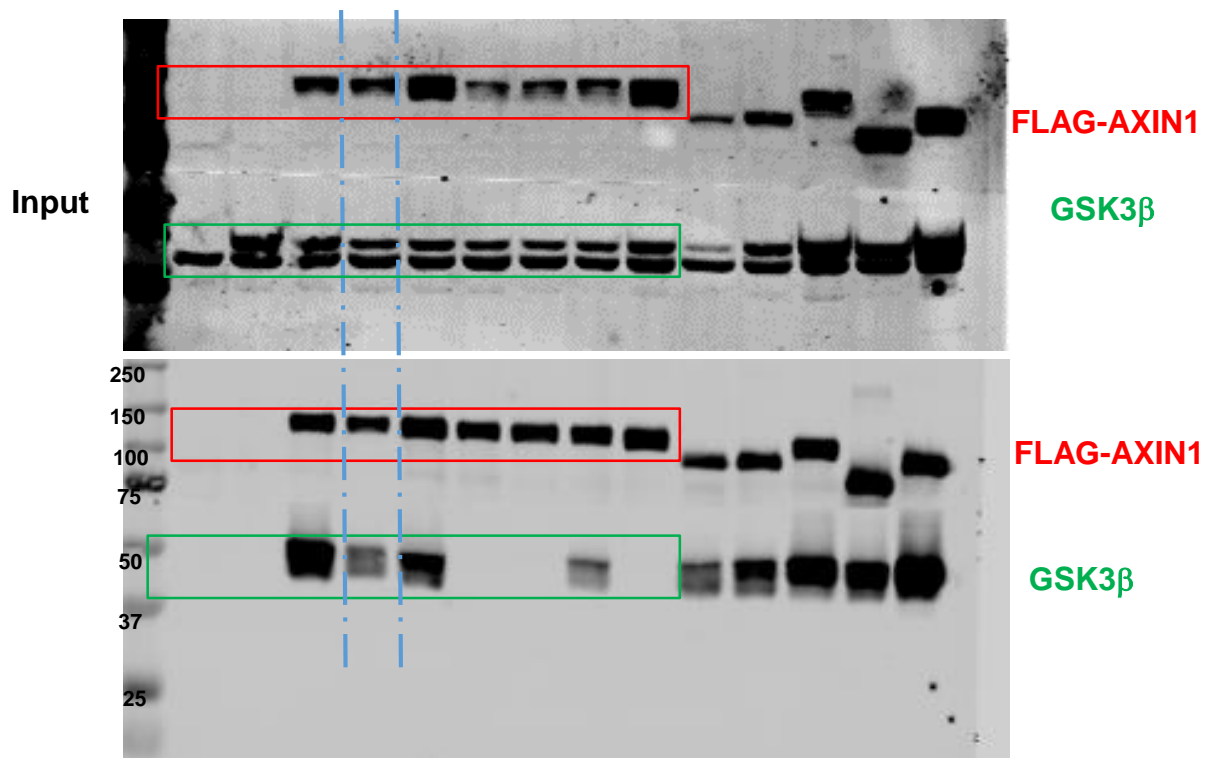

| Lane | loading      |
|------|--------------|
| 1    | Marker       |
| 2    | NO           |
| 3    | EV           |
| 4    | WT           |
| 5    | R395C        |
| 6    | R373_V383del |
| 7    | V383_I393del |
| 8    | I393_T402del |
| 9    | T402_M418del |
| 10   | R373_M418del |

**Fig. 3F**

**Input**

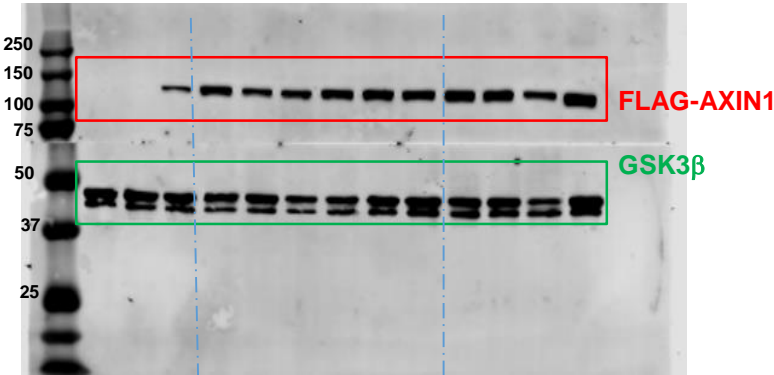

| Lane | loading       |                      |
|------|---------------|----------------------|
| 1    | Marker        |                      |
| 2    | NO            |                      |
| 3    | EV            |                      |
| 4    | WT            |                      |
| 5    | Q386H         | transfected HA-GSK3β |
| 6    | A389V         |                      |
| 7    | E391K         |                      |
| 8    | H394N         |                      |
| 9    | R395H         |                      |
| 10   | R395P         |                      |
| 11   | R401H         |                      |
| 12   | R401C         |                      |
| 13   | T402K         |                      |
| 14   | R 373_M418del |                      |
| 15   | Marker        |                      |

**IP**

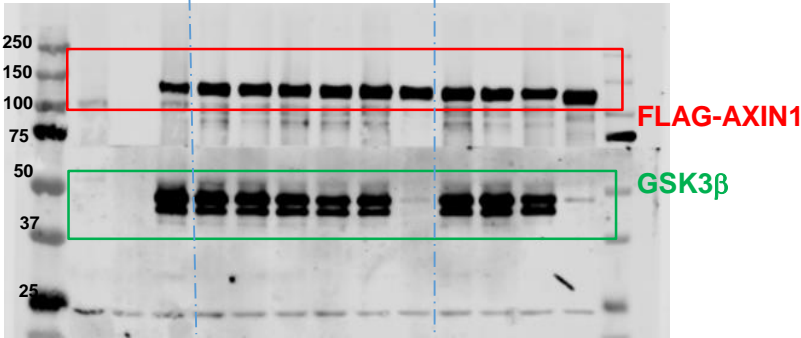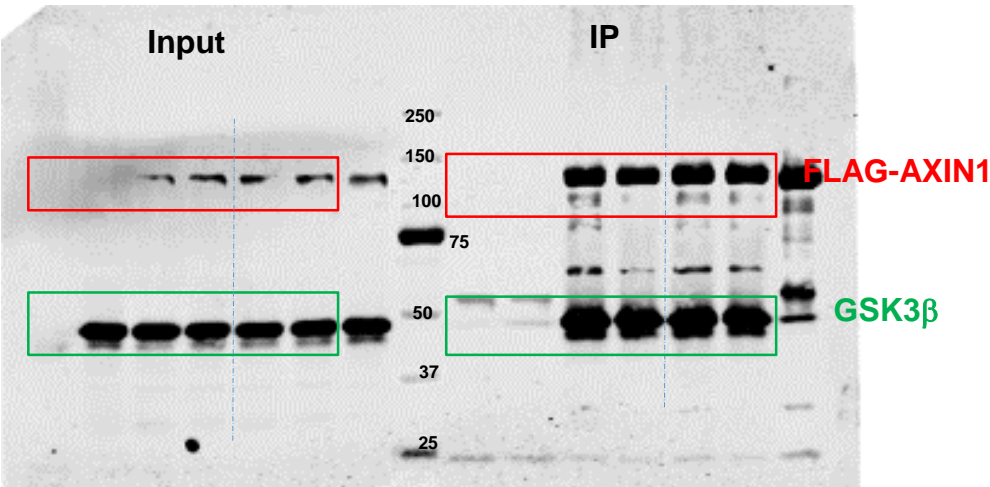

| Lane | loading      |                      |
|------|--------------|----------------------|
| 1    | NO           |                      |
| 2    | EV           |                      |
| 3    | WT           |                      |
| 4    | P385A        | Transfected HA-GSK3β |
| 5    | R395C        |                      |
| 6    | L396M        |                      |
| 7    | R373_M418del |                      |
| 8    | Marker       |                      |
| 9    | NO           |                      |
| 10   | EV           |                      |
| 11   | WT           | Transfected HA-GSK3β |
| 12   | P385A        |                      |
| 13   | R395C        |                      |
| 14   | L396M        |                      |
| 15   | R373_M418del |                      |

**Fig. 4E**

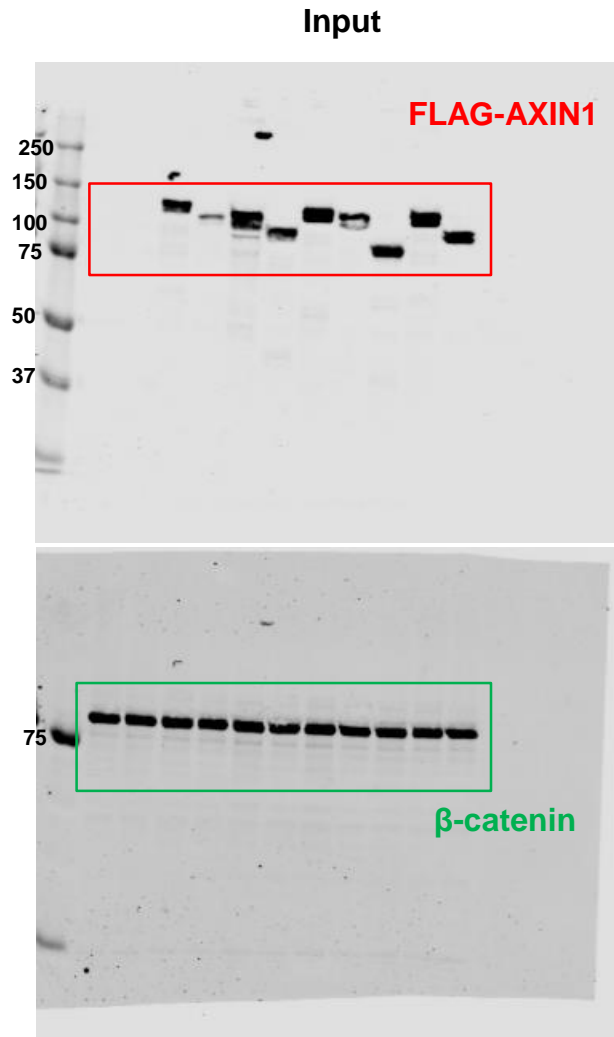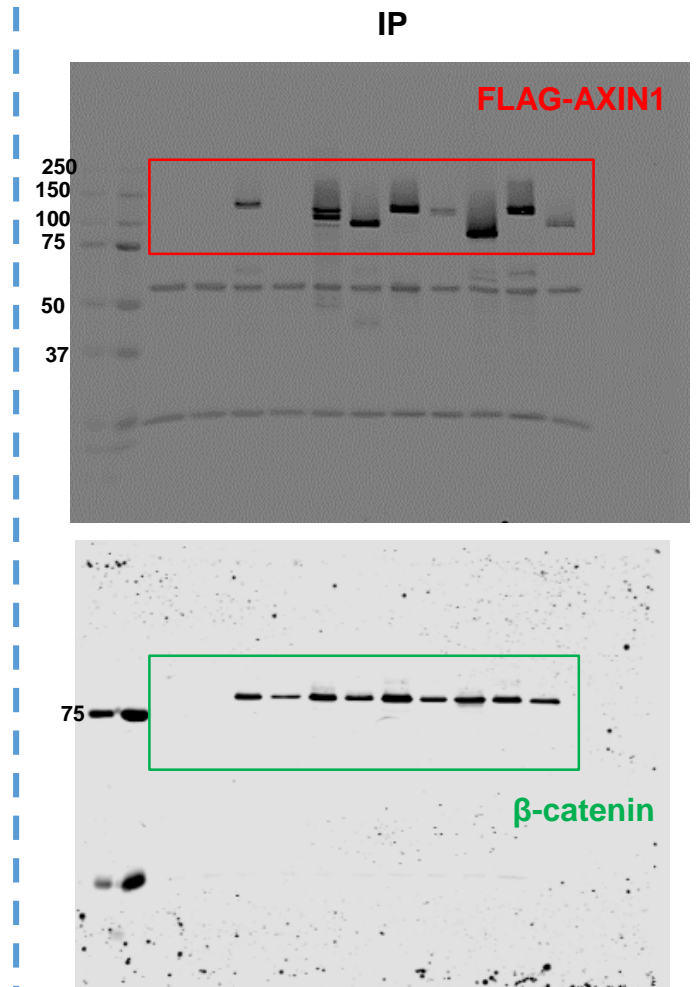

| Lane | loading           | Input samples  |
|------|-------------------|----------------|
| 1    | Marker            |                |
| 2    | No                |                |
| 3    | Ev                |                |
| 4    | WT                |                |
| 5    | Tankyrase         | Deleted domain |
| 6    | APC/RGS 81-212del |                |
| 7    | MEKK1             |                |
| 8    | GSK3β             |                |
| 9    | β-catenin         |                |
| 10   | CK1               |                |
| 11   | PP2Ac             |                |
| 12   | DVL/DIX           |                |

| Lane | loading           | IP samples     |
|------|-------------------|----------------|
| 1    | Marker            |                |
| 2    | Marker            |                |
| 3    | No                |                |
| 4    | Ev                |                |
| 5    | WT                | Deleted domain |
| 6    | Tankyrase         |                |
| 7    | APC/RGS 81-212del |                |
| 8    | MEKK1             |                |
| 9    | GSK3β             |                |
| 10   | β-catenin         |                |
| 11   | CK1               |                |
| 12   | PP2Ac             |                |
| 13   | DVL/DIX           |                |

**Fig. 4F**

**Input**

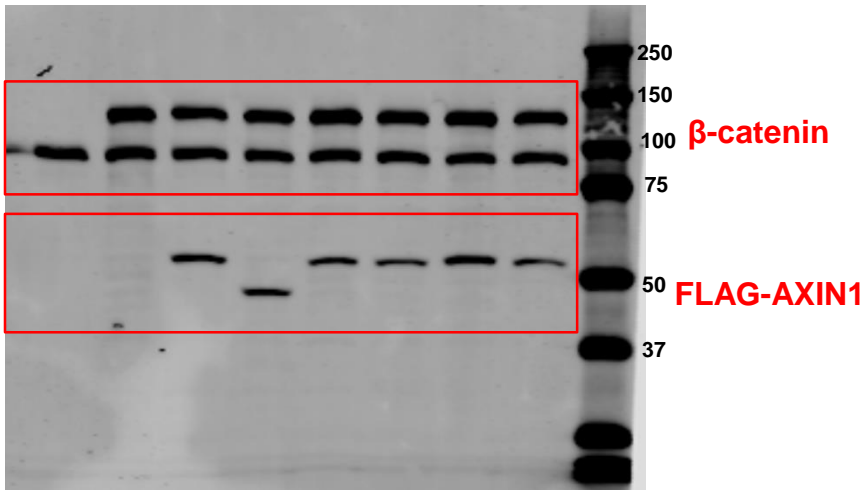

| Lane | loading          |
|------|------------------|
| 1    | No               |
| 2    | Ev               |
| 3    | M1_G430del       |
| 4    | M1_P503del       |
| 5    | M1_G430del-D461N |
| 6    | M1_G430del-N466Y |
| 7    | M1_G430del-V478G |
| 8    | M1_G430del-P482H |
| 9    | Marker           |

**IP**

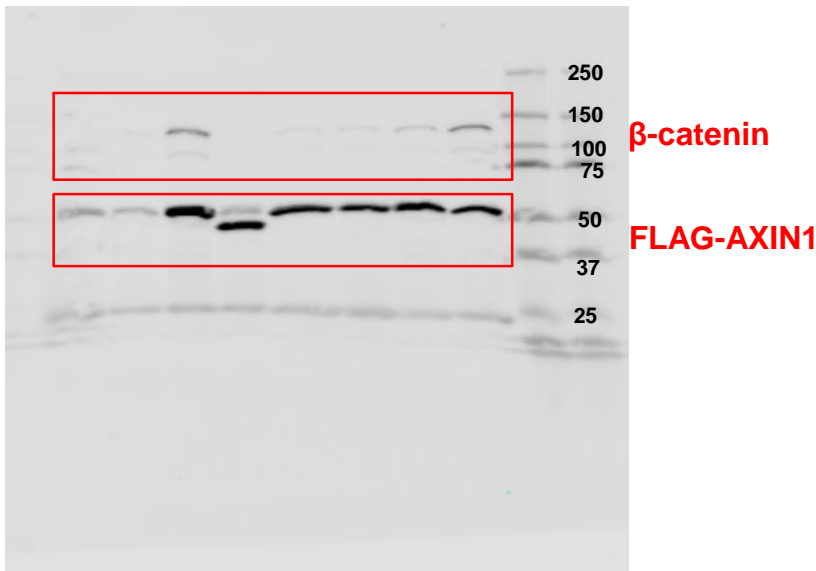

| Lane | loading          |
|------|------------------|
| 1    | No               |
| 2    | Ev               |
| 3    | M1_G430del       |
| 4    | M1_P503del       |
| 5    | M1_G430del-D461N |
| 6    | M1_G430del-N466Y |
| 7    | M1_G430del-V478G |
| 8    | M1_G430del-P482H |
| 9    | Marker           |
| 10   | Marker           |

# Fig. 5B

Page 1 Input membrane

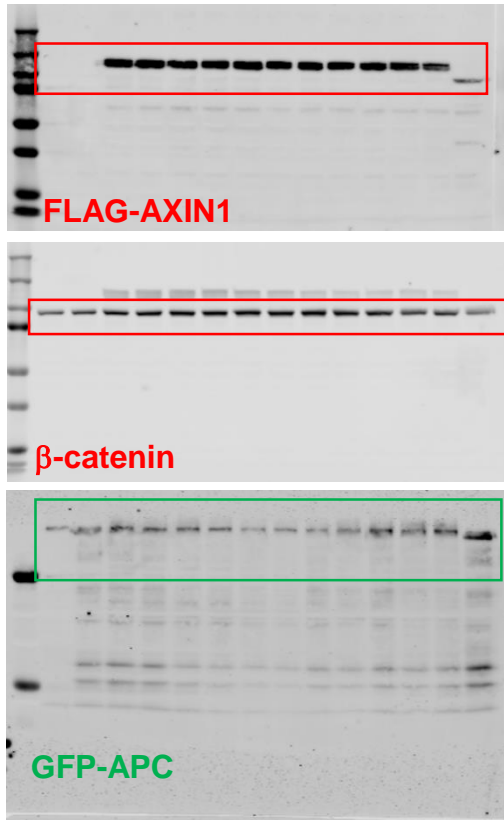

| Lane | 10%       | Loading |
|------|-----------|---------|
| 1    | Marker    |         |
| 2    | NO        |         |
| 3    | EV        |         |
| 4    | WT        |         |
| 5    | G69E      |         |
| 6    | G69V      |         |
| 7    | P72T      |         |
| 8    | E73K      |         |
| 9    | E73Q      |         |
| 10   | G74S      |         |
| 11   | A76T      |         |
| 12   | A76V      |         |
| 13   | S77F      |         |
| 14   | P78S      |         |
| 15   | 65_228del |         |

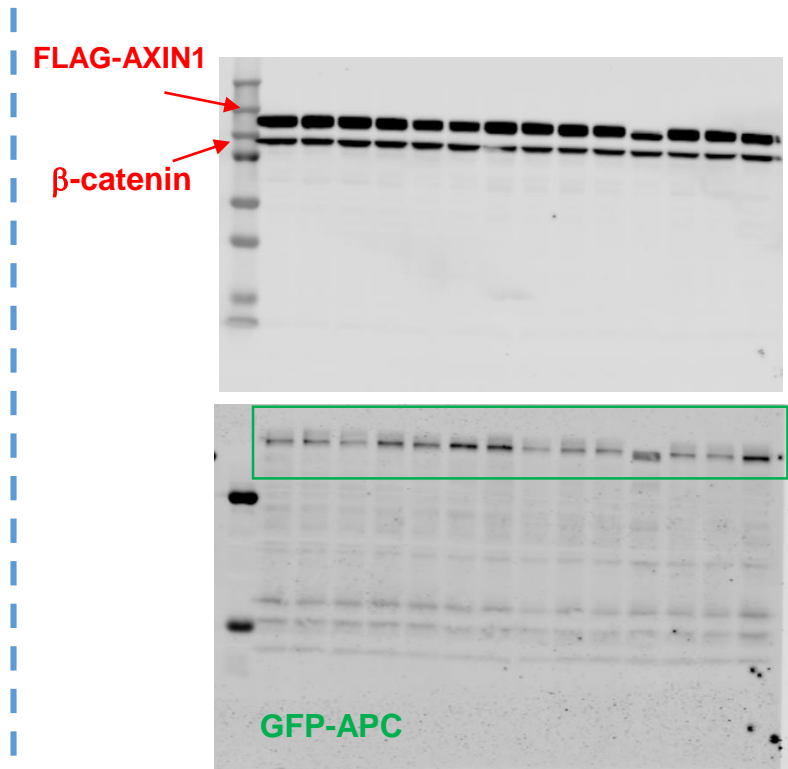

| Lane | 10%     | Loading |
|------|---------|---------|
| 1    | Marker  |         |
| 2    | p.S88P  |         |
| 3    | p.H90Y  |         |
| 4    | p.S91F  |         |
| 5    | p.D94N  |         |
| 6    | p.G98R  |         |
| 7    | p.G98E  |         |
| 8    | p.S100N |         |
| 9    | p.L101P |         |
| 10   | p.R103M |         |
| 11   | T104N   |         |
| 12   | L106R   |         |
| 13   | K107I   |         |
| 14   | Q108H   |         |
| 15   | E109D   |         |

# Fig. 5B

Page 2 Input membrane

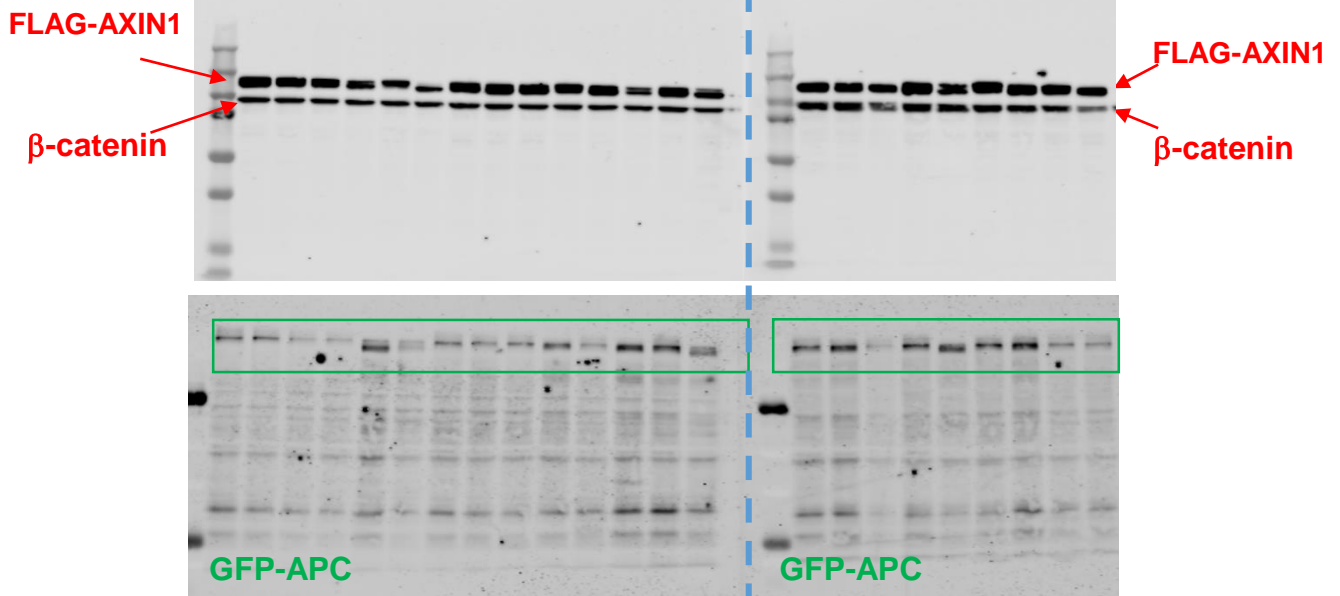

| Lane | 10% | Loading |
|------|-----|---------|
| 1    |     | Marker  |
| 2    |     | G110A   |
| 3    |     | A112T   |
| 4    |     | D113N   |
| 5    |     | D113Y   |
| 6    |     | A120D   |
| 7    |     | C121F   |
| 8    |     | C121S   |
| 9    |     | R125W   |
| 10   |     | A141T   |
| 11   |     | A143D   |
| 12   |     | I149T   |
| 13   |     | V156M   |
| 14   |     | K161T   |
| 15   |     | A185D   |

| Lane | 10% | Loading   |
|------|-----|-----------|
| 1    |     | Marker    |
| 2    |     | A185V     |
| 3    |     | A185T     |
| 4    |     | E188K     |
| 5    |     | L202F     |
| 6    |     | L202P     |
| 7    |     | LK202/3QN |
| 8    |     | I206M     |
| 9    |     | Y207C     |
| 10   |     | E209Q     |



**Fig. 5B**

Page 3 IP membrane

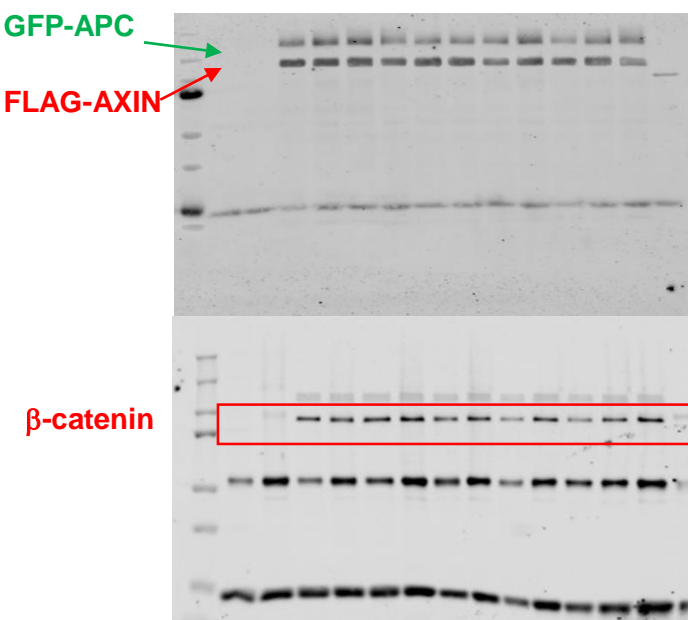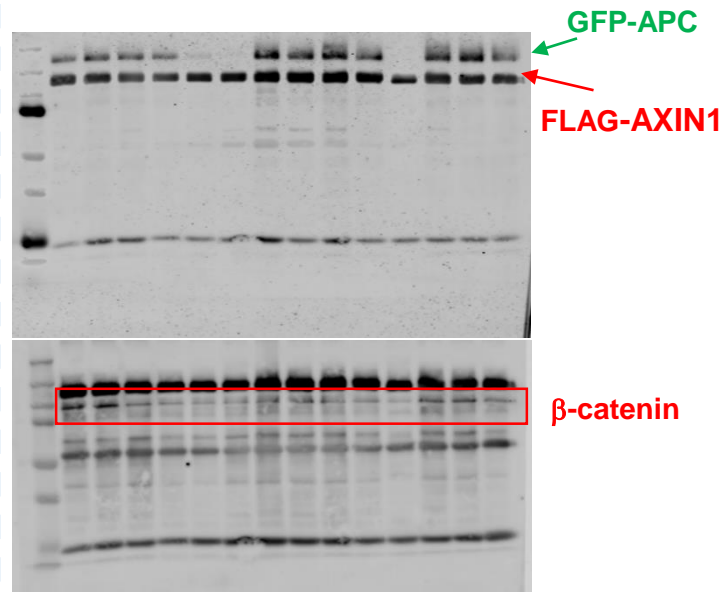

| Lane | 10%       | Loading |
|------|-----------|---------|
| 1    | Marker    | Marker  |
| 2    | NO        |         |
| 3    | EV        |         |
| 4    | WT        |         |
| 5    | G69E      |         |
| 6    | G69V      |         |
| 7    | P72T      |         |
| 8    | E73K      |         |
| 9    | E73Q      |         |
| 10   | G74S      |         |
| 11   | A76T      |         |
| 12   | A76V      |         |
| 13   | S77F      |         |
| 14   | P78S      |         |
| 15   | 65_228del |         |

| Lane | 10%     | Loading |
|------|---------|---------|
| 1    | Marker  | Marker  |
| 2    | p.S88P  |         |
| 3    | p.H90Y  |         |
| 4    | p.S91F  |         |
| 5    | p.D94N  |         |
| 6    | p.G98R  |         |
| 7    | p.G98E  |         |
| 8    | p.S100N |         |
| 9    | p.L101P |         |
| 10   | p.R103M |         |
| 11   | T104N   |         |
| 12   | L106R   |         |
| 13   | K107I   |         |
| 14   | Q108H   |         |
| 15   | E109D   |         |

**Fig. 5B**

Page 4 IP membrane

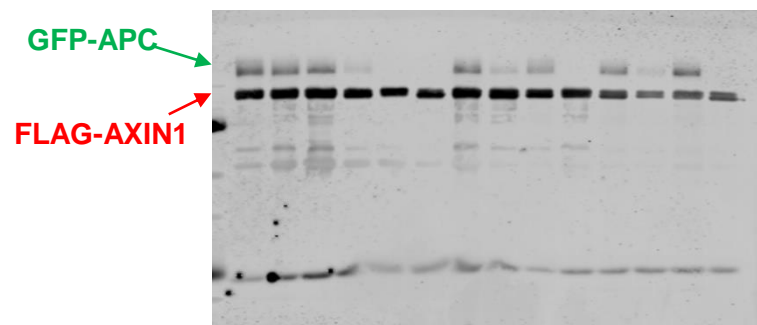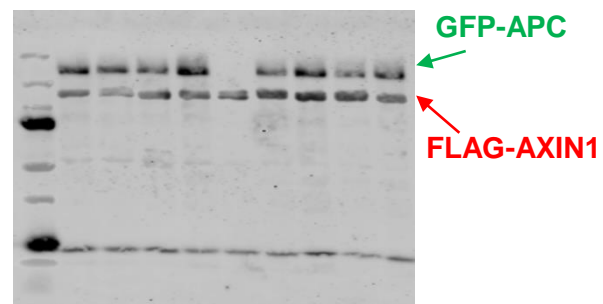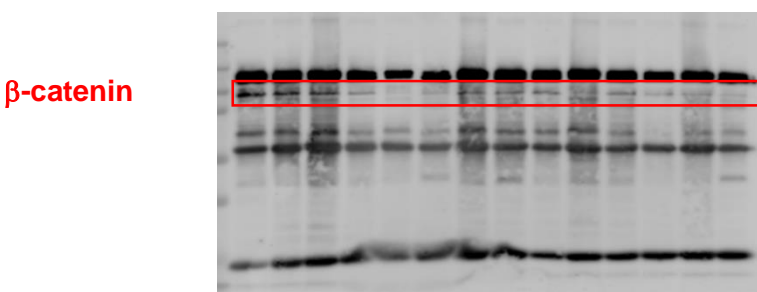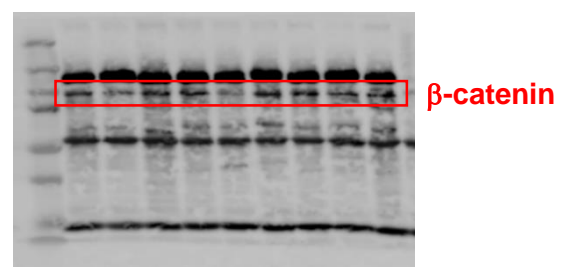

| Lane | 10% | Loading |
|------|-----|---------|
| 1    |     | Marker  |
| 2    |     | G110A   |
| 3    |     | A112T   |
| 4    |     | D113N   |
| 5    |     | D113Y   |
| 6    |     | A120D   |
| 7    |     | C121F   |
| 8    |     | C121S   |
| 9    |     | R125W   |
| 10   |     | A141T   |
| 11   |     | A143D   |
| 12   |     | I149T   |
| 13   |     | V156M   |
| 14   |     | K161T   |
| 15   |     | A185D   |

| Lane | 10% | Loading   |
|------|-----|-----------|
| 1    |     | Marker    |
| 2    |     | A185V     |
| 3    |     | A185T     |
| 4    |     | E188K     |
| 5    |     | L202F     |
| 6    |     | L202P     |
| 7    |     | LK202/3QN |
| 8    |     | I206M     |
| 9    |     | Y207C     |
| 10   |     | E209Q     |

**Fig. 7B**

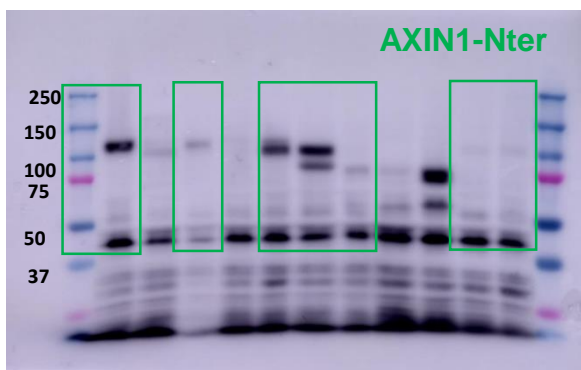

| Lane | loading               |
|------|-----------------------|
| 1    | Marker                |
| 2    | WT                    |
| 3    | R839fs*17             |
| 4    | <b>R841fs*10-b6</b>   |
| 5    | R841fs*20-a5          |
| 6    | <b>R723fs*21-e8</b>   |
| 7    | <b>R723fs*40-b9</b>   |
| 8    | <b>L506Tfs*83-e5</b>  |
| 9    | L506Tfs*83-e10        |
| 10   | K501Tfs*83-C11        |
| 11   | <b>R395Afs*17-a5</b>  |
| 12   | <b>R395Afs*17-a11</b> |
| 13   | Marker                |

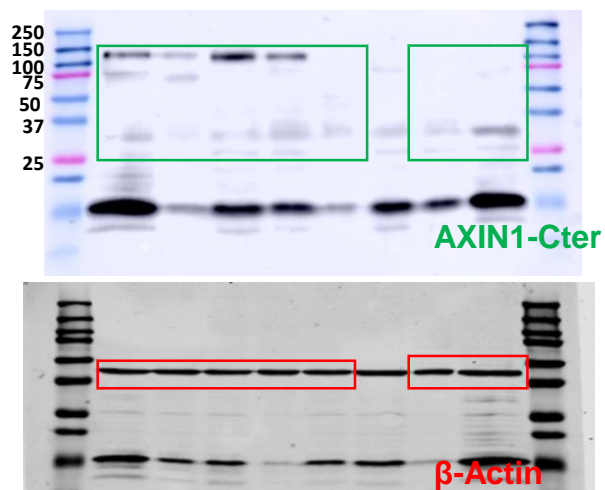

| Lane | loading               |
|------|-----------------------|
| 1    | Marker                |
| 2    | WT                    |
| 3    | <b>R841fs*10-b6</b>   |
| 4    | <b>R723fs*21-e8</b>   |
| 5    | <b>R723fs*40-b9</b>   |
| 6    | <b>L506Tfs*83-e5</b>  |
| 7    | L506Tfs*83-e10        |
| 8    | <b>R395Afs*17-a5</b>  |
| 9    | <b>R395Afs*17-a11</b> |
| 10   | Marker                |

# Supplementary Fig.6B

## Input

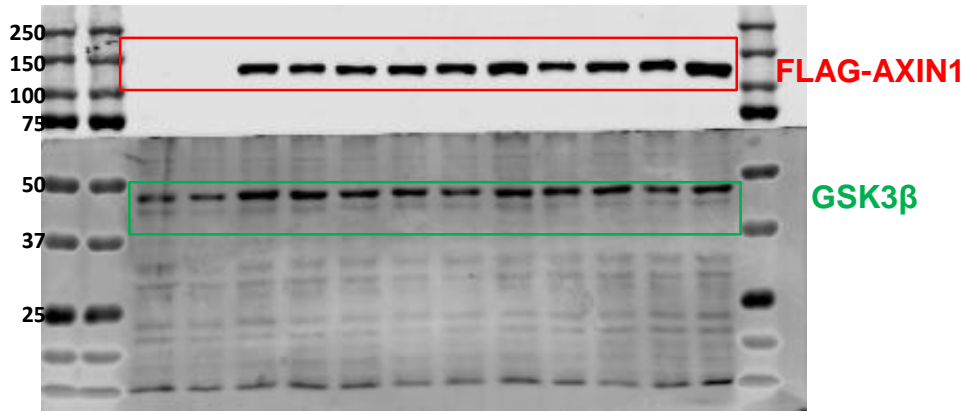

| Lane | loading      |
|------|--------------|
| 1    | Marker       |
| 2    | Marker       |
| 3    | No           |
| 4    | Ev           |
| 5    | WT           |
| 6    | P385A        |
| 7    | L396M        |
| 8    | R403W        |
| 9    | L409M        |
| 10   | R412Q        |
| 11   | L413R        |
| 12   | L413M        |
| 13   | R417H        |
| 14   | R373_M418del |
| 15   | Marker       |

## IP

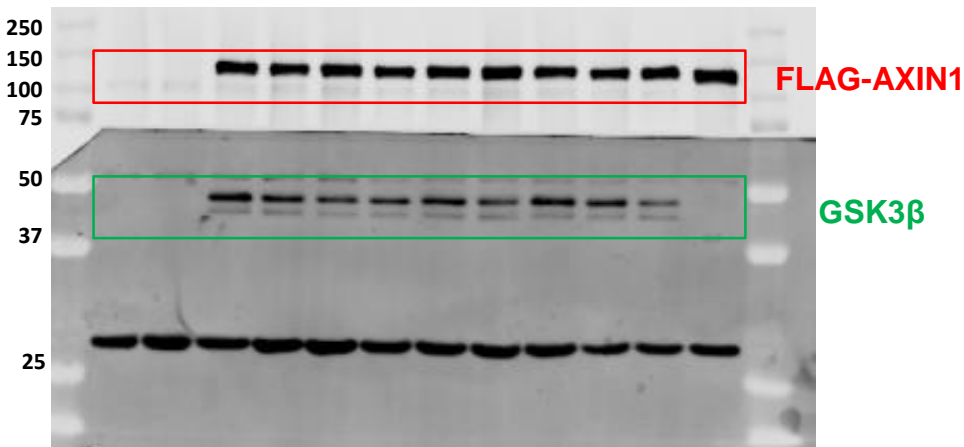

| Lane | loading      |
|------|--------------|
| 1    | Marker       |
| 2    | No           |
| 3    | Ev           |
| 4    | WT           |
| 5    | P385A        |
| 6    | L396M        |
| 7    | R403W        |
| 8    | L409M        |
| 9    | R412Q        |
| 10   | L413R        |
| 11   | L413M        |
| 12   | R417H        |
| 13   | R373_M418del |
| 14   | Marker       |
| 15   |              |

# Supplementary Fig.7a

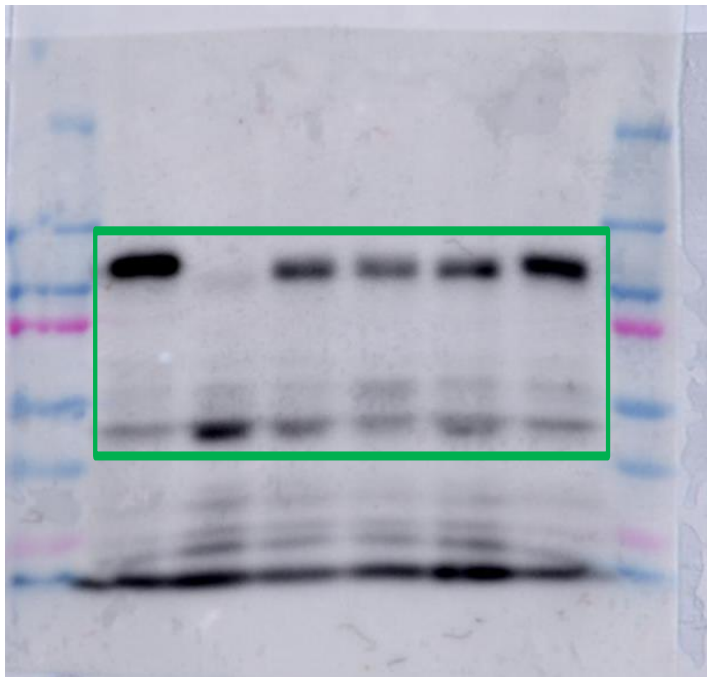

WT  
R395Afs\*17-a5  
R395P-CL.4  
R395P-CL.41  
R395P-cl.48  
R395H-CL.17

AXIN1-NTER

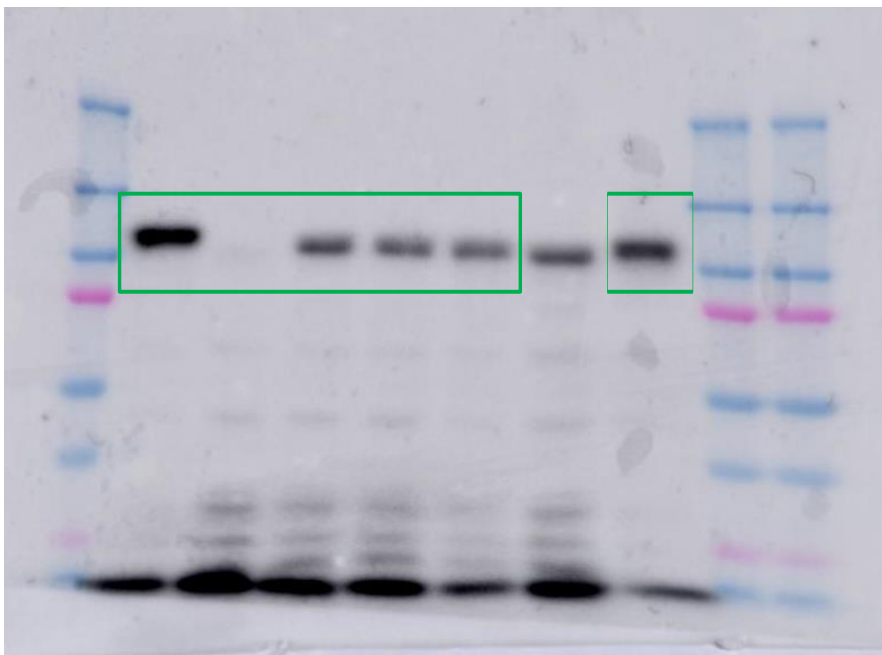

WT  
R395Afs\*17-a5  
R395P-CL.4  
R395P-CL.41  
R395P-cl.48  
KO-33  
R395H-CL.17

AXIN1-CTER

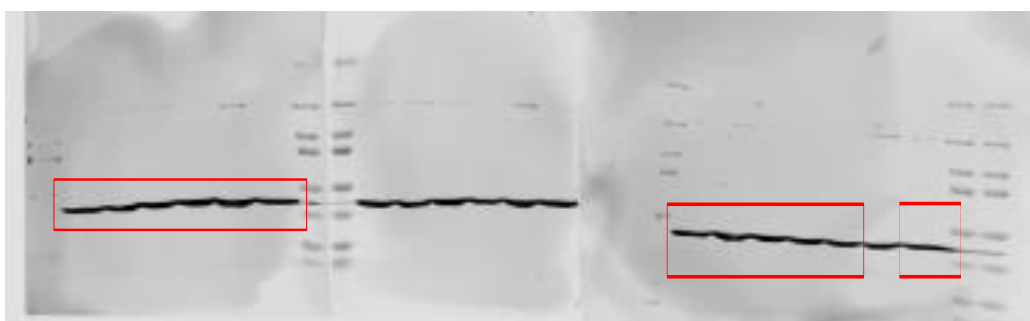

$\beta$ -Actin

Supplementary Fig.9A

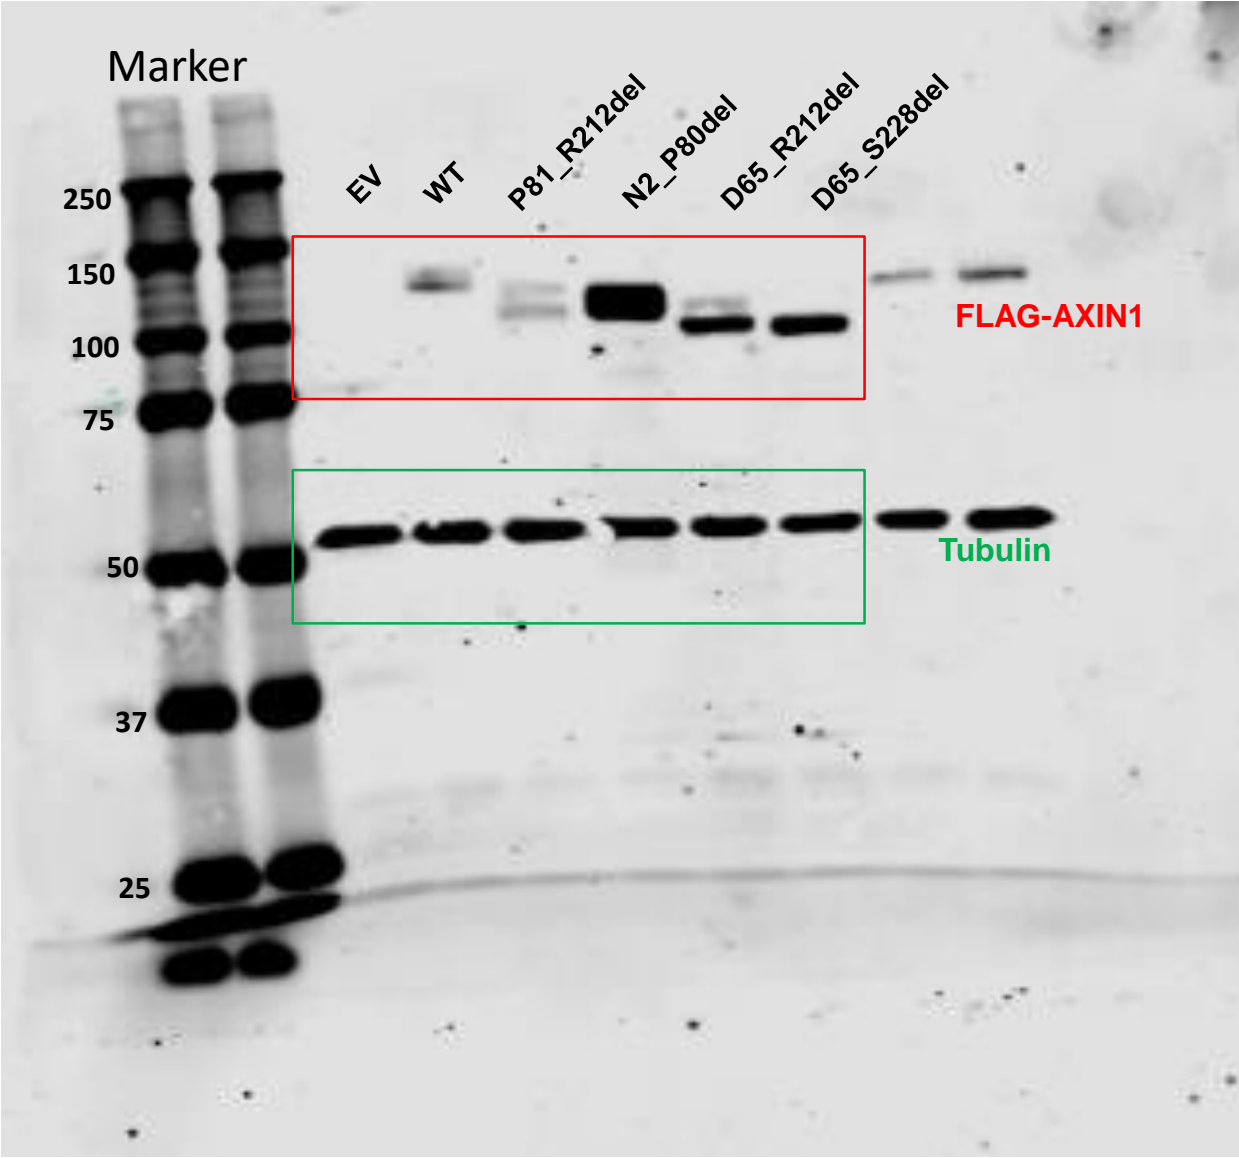

# Supplementary Fig.9B

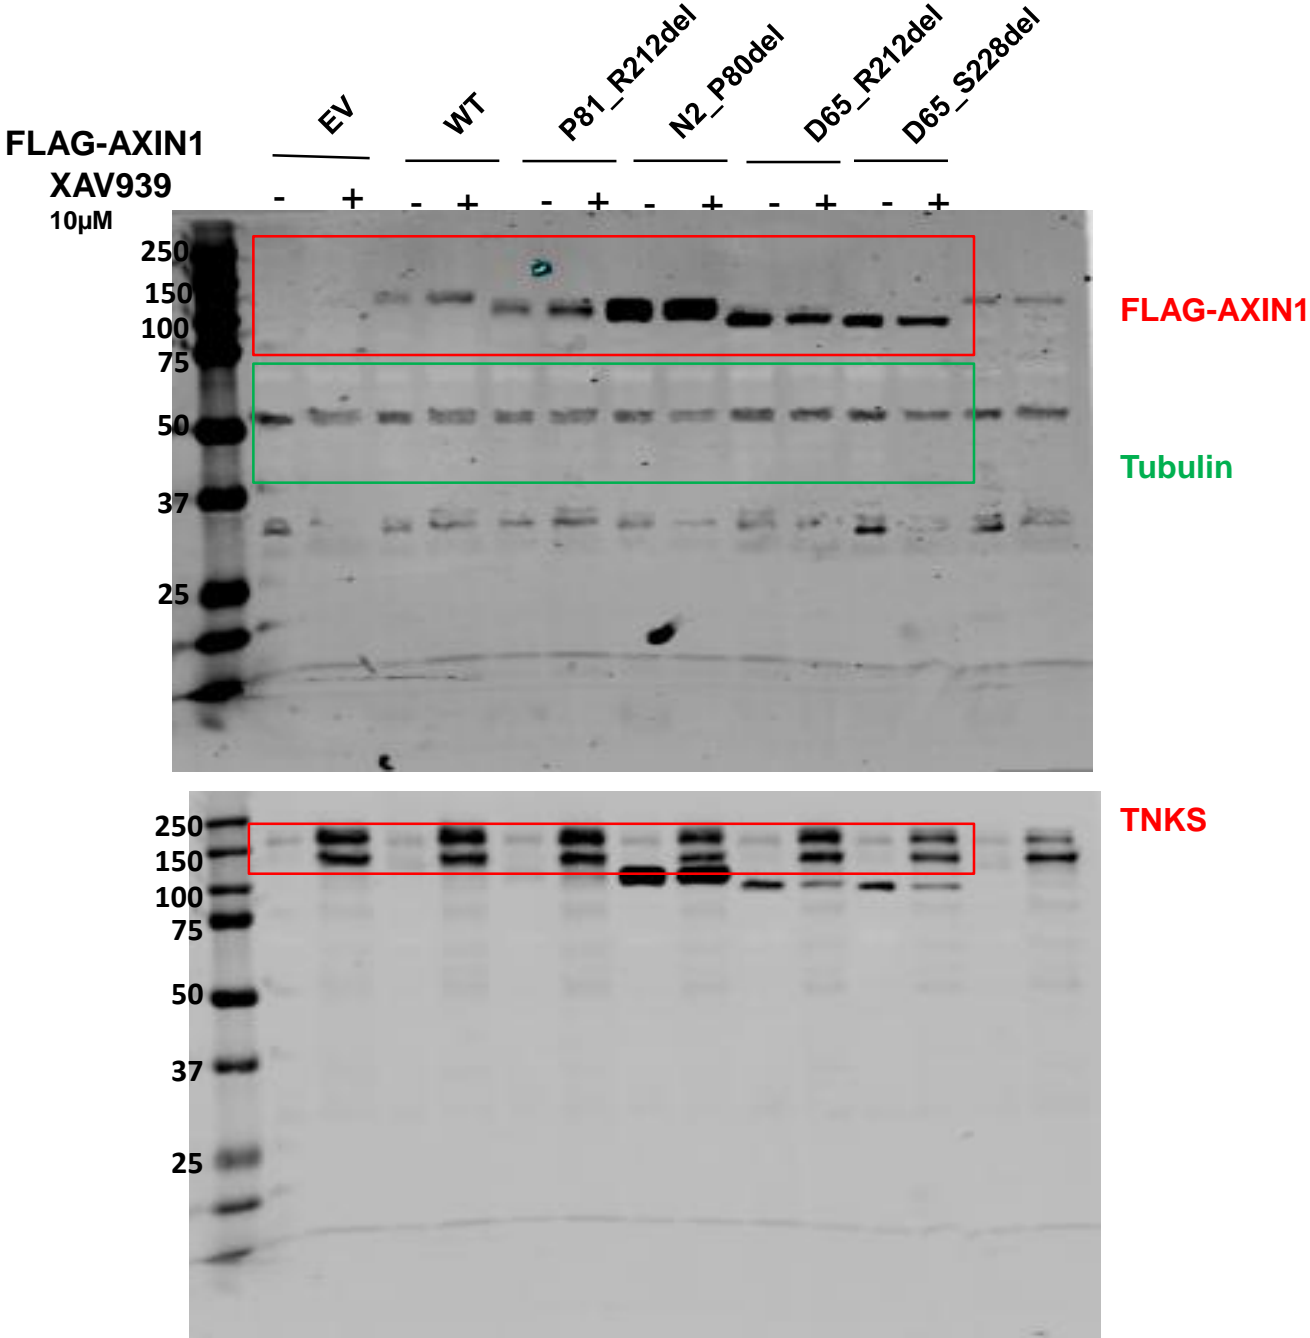

Supplementary Fig.10B

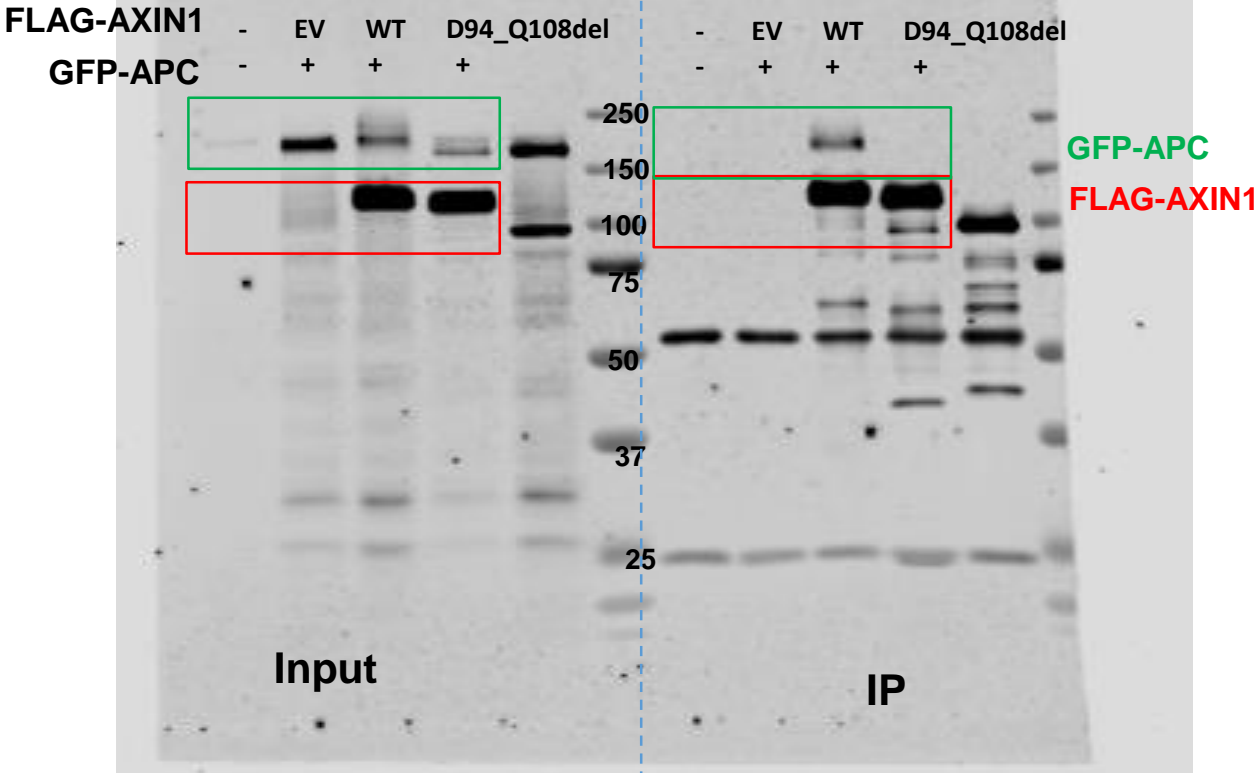



# Supplementary Fig.10C

## JHH7

Parental Homo-A6 Homo-A8 Homo-B9

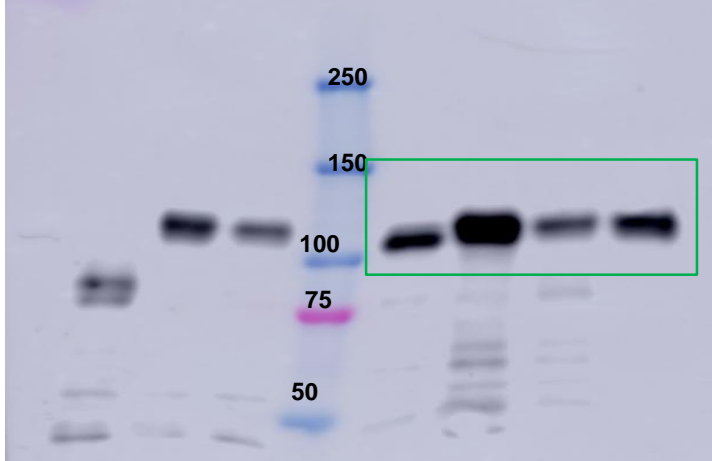

AXIN1-Cter

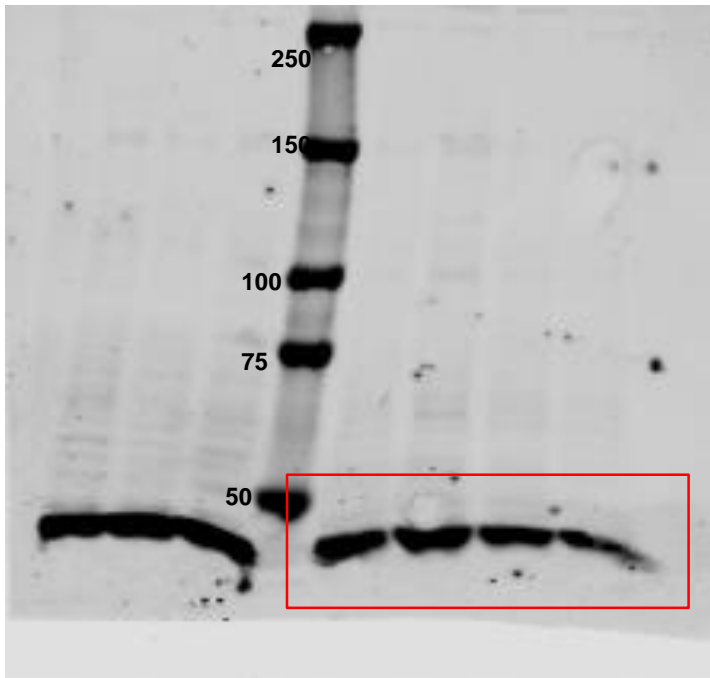

$\beta$ -Actin

# Supplementary Fig.12B

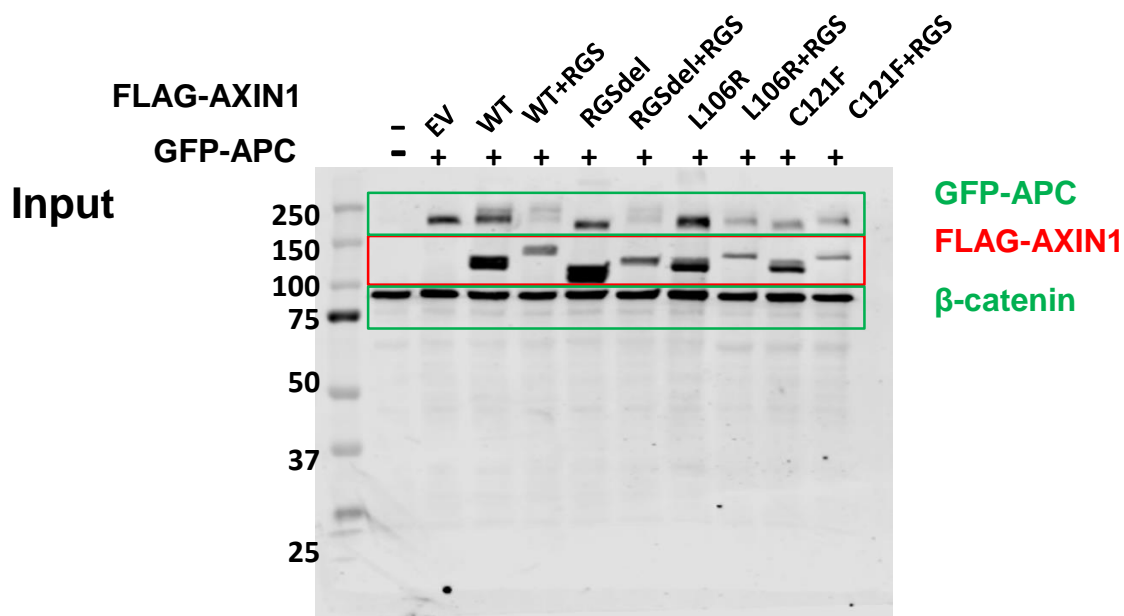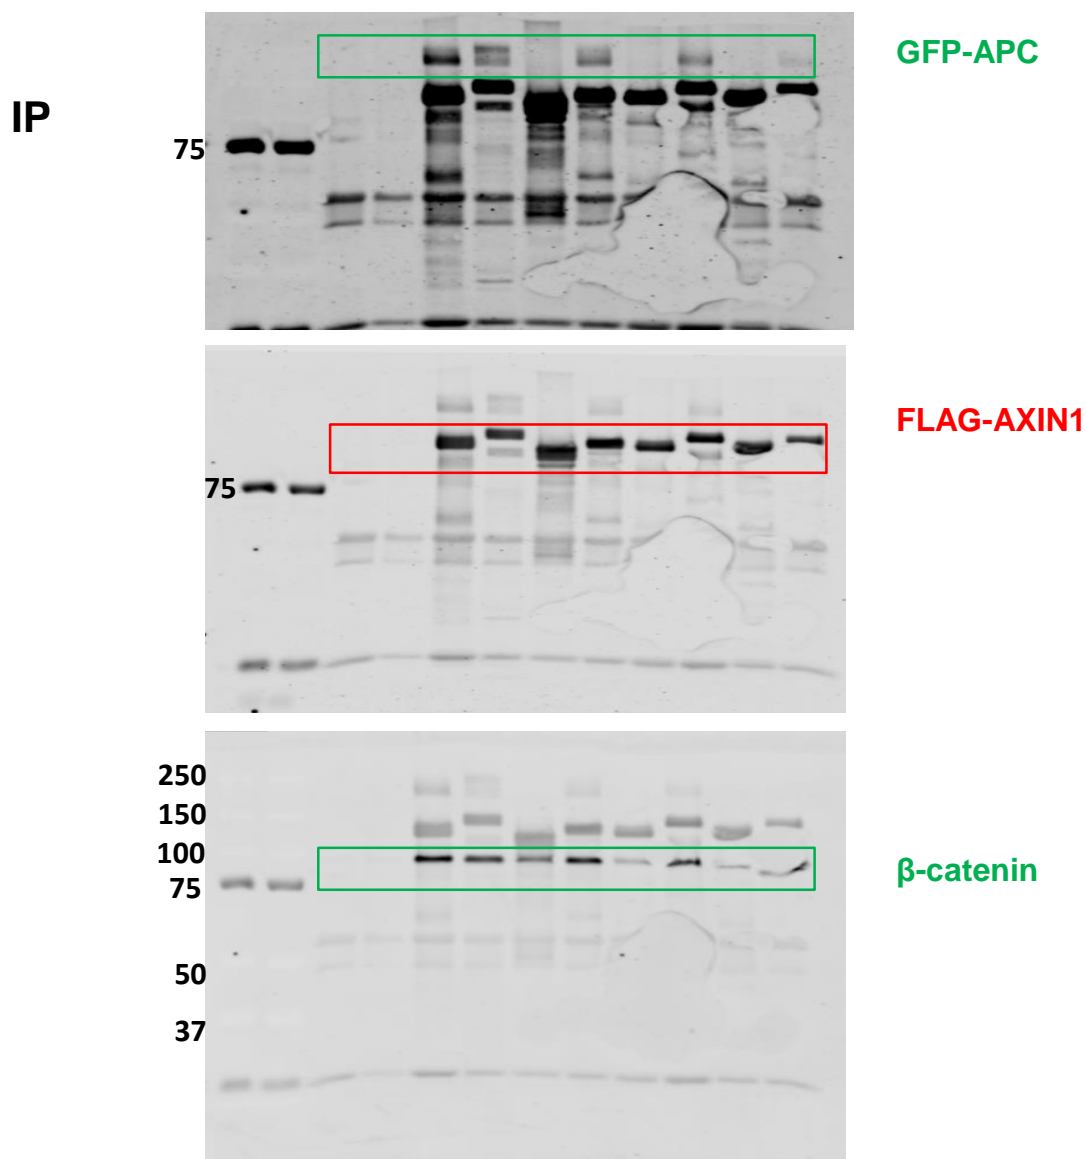

# Supplementary Fig.12C

| FLAG-AXIN1 | - | EV | WT | WT+RGS | G98E | G98E+RGS | A120D | A120D+RGS | A143D | A143D+RGS | A185D | A185D+RGS | L202P | L202P+RGS |
|------------|---|----|----|--------|------|----------|-------|-----------|-------|-----------|-------|-----------|-------|-----------|
| GFP-APC    | + | +  | +  | +      | +    | +        | +     | +         | +     | +         | +     | +         | +     | +         |

**Input**

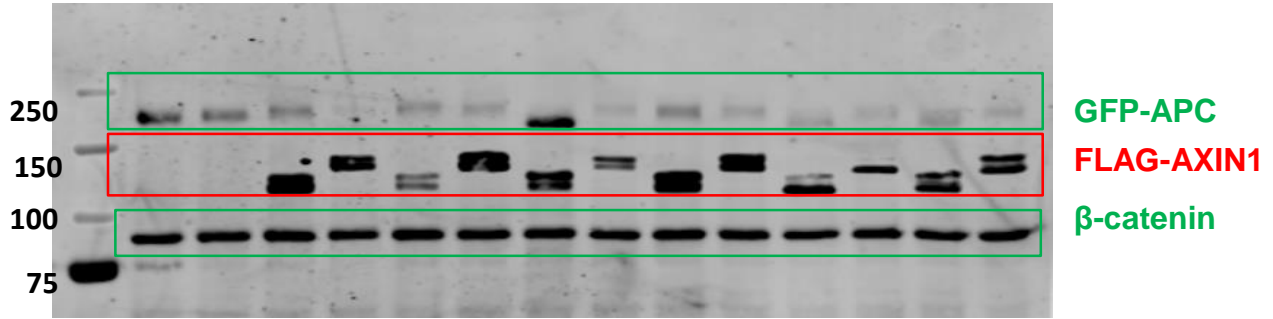

**IP**

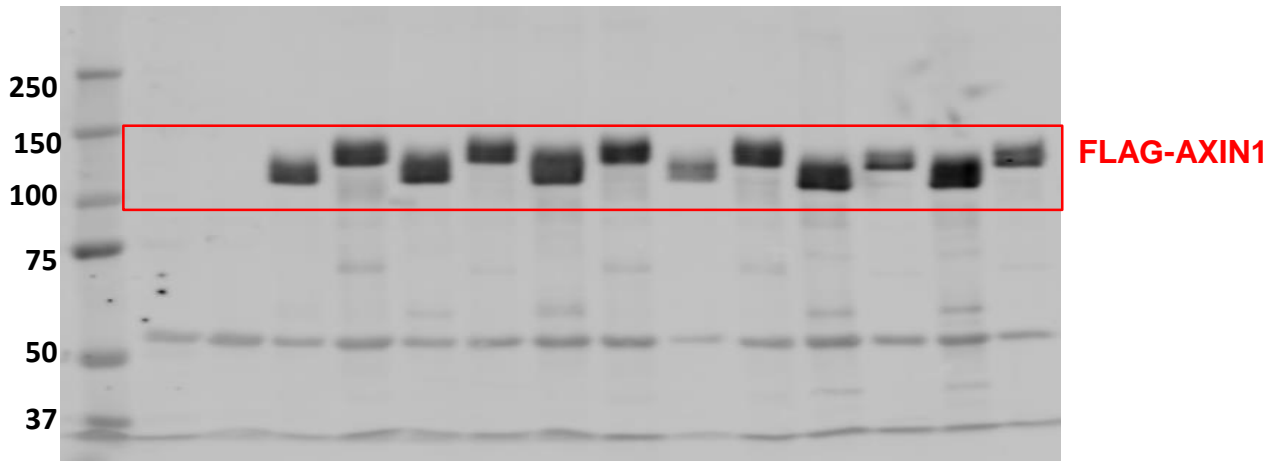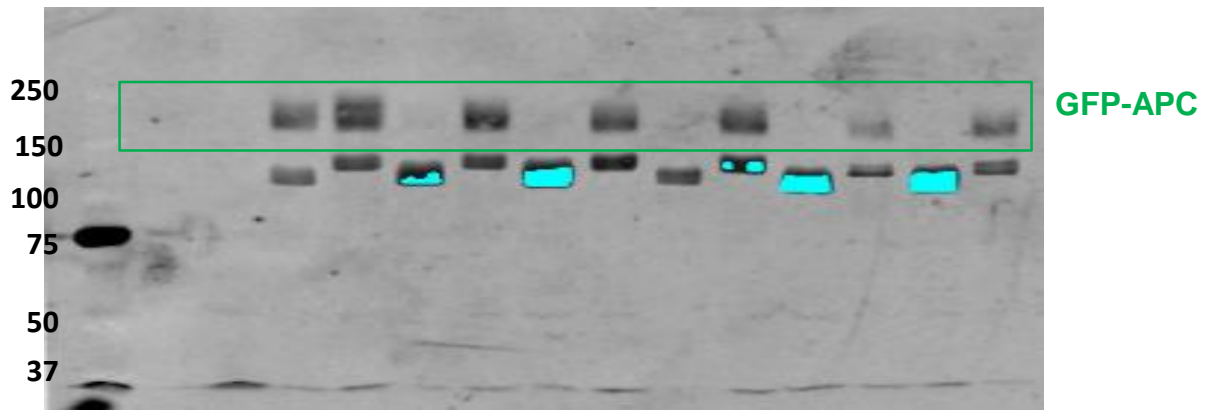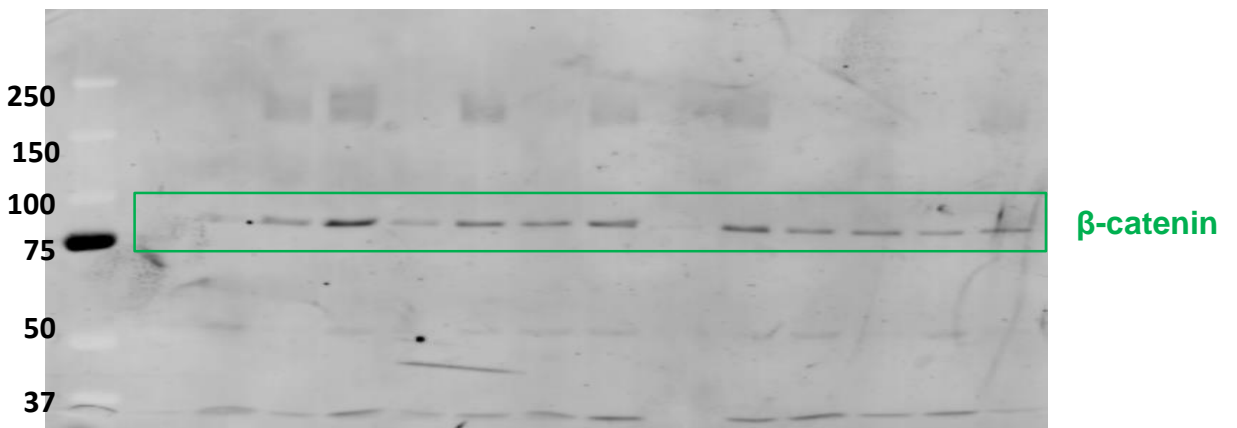

Supplement: can-23-2268_supplementary_data1_suppsd1.pdf [file can-23-2268_supplementary_data1_suppsd1.pdf]
