# Supplementary material for: Analysis of Tumor-Associated AXIN1 Missense Mutations Identifies Variants That Activate β-Catenin Signaling
Source: PubMed Central journal article supplement — Cancer Res. 2024 Feb 15;84(9):1443–59. doi: 10.1158/0008-5472.CAN-23-2268 (PMC11063763; doi:10.1158/0008-5472.can-23-2268), 2024-02-15
Supplement: can-23-2268_supplementary_figure_2_suppsf2.pdf [file can-23-2268_supplementary_figure_2_suppsf2.pdf]

## Supplementary Figures

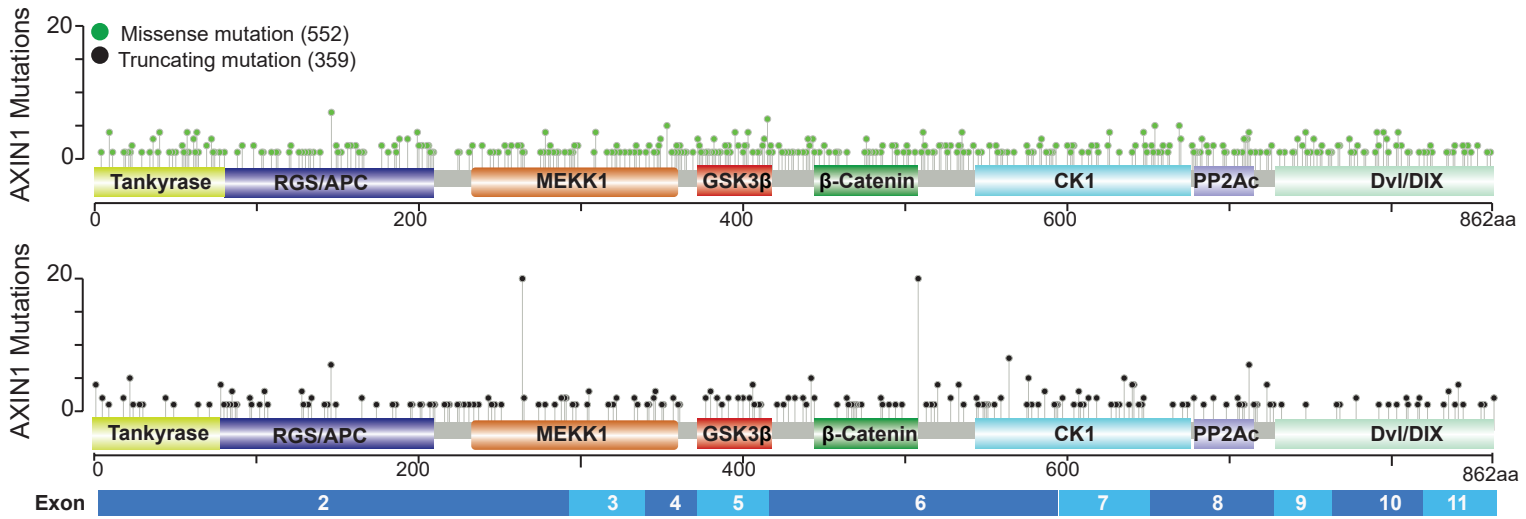

### Supplementary Fig 2 Analysis of the AXIN1 mutational landscape

Distribution of truncating and missense AXIN1 mutations, as reported in cBioPortal in multiple human cancer types. Both mutation types appear evenly distributed along the AXIN1 protein with no clear hotspots.
