# Supplementary material for: Analysis of Tumor-Associated AXIN1 Missense Mutations Identifies Variants That Activate β-Catenin Signaling
Source: PubMed Central journal article supplement — Cancer Res. 2024 Feb 15;84(9):1443–59. doi: 10.1158/0008-5472.CAN-23-2268 (PMC11063763; doi:10.1158/0008-5472.can-23-2268), 2024-02-15
Supplement: can-23-2268_supplementary_figure_3_suppsf3.pdf [file can-23-2268_supplementary_figure_3_suppsf3.pdf]

# ConSurf Results of human AXIN1

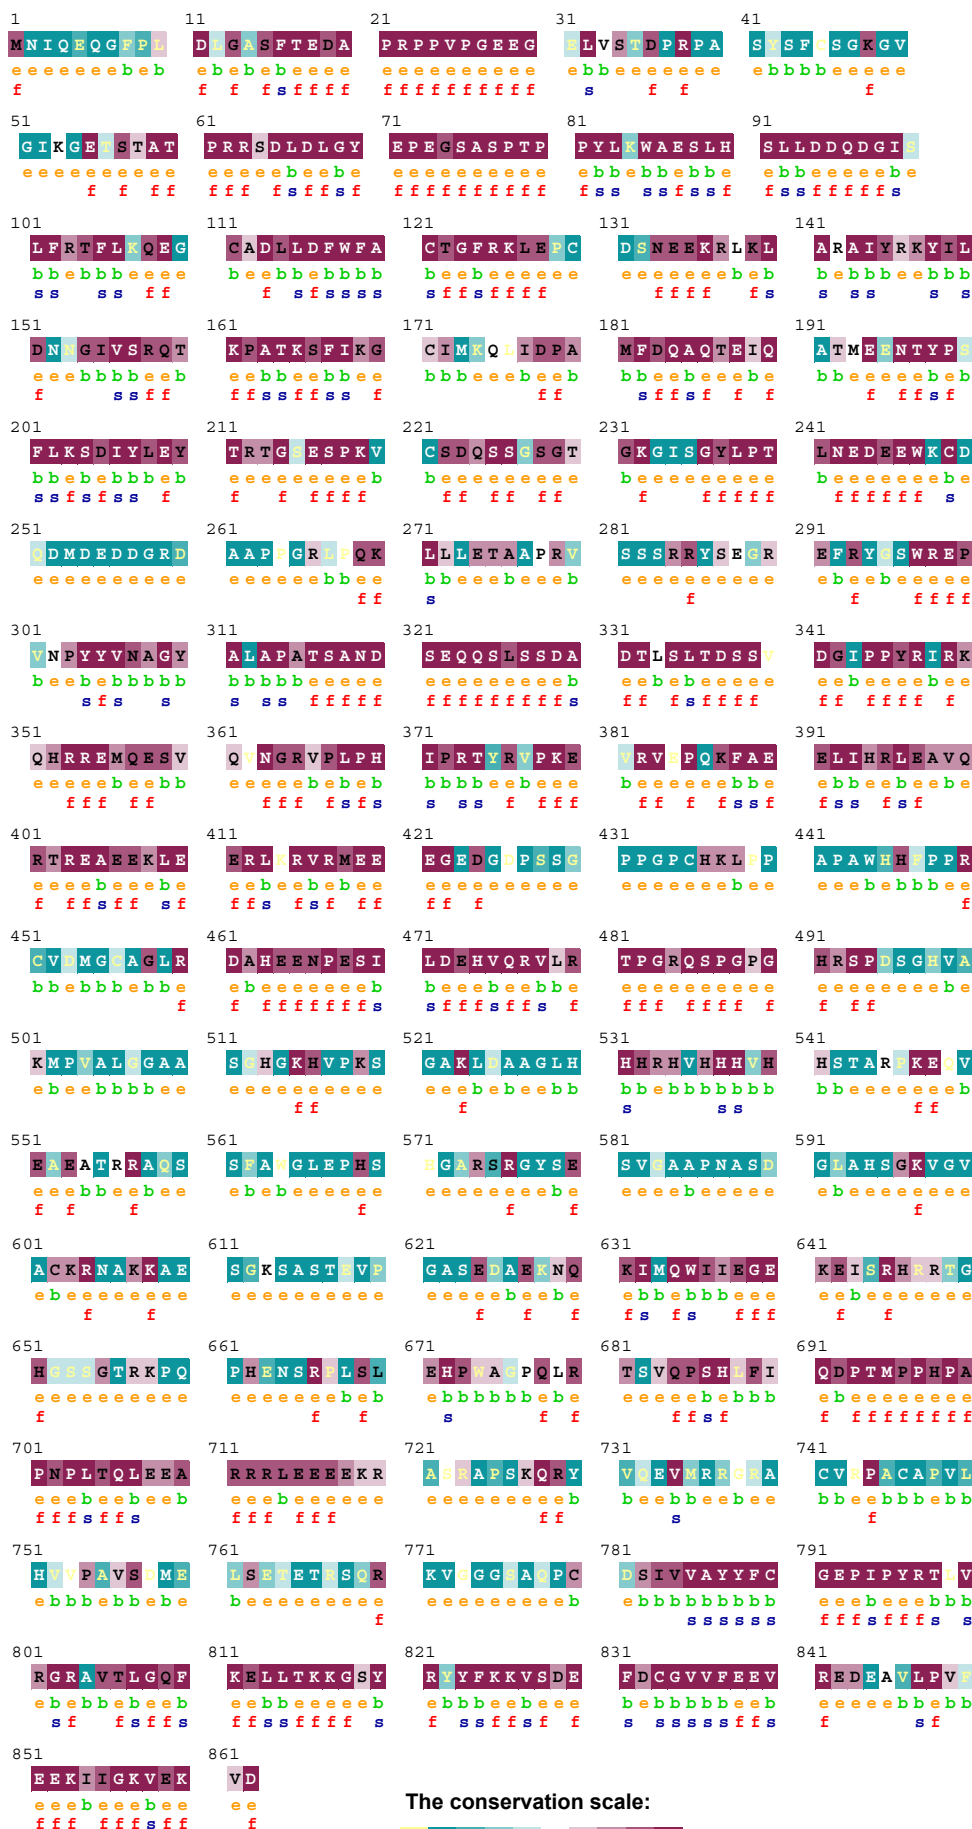

The conservation scale:

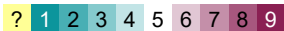

Variable Average Conserved

- e - An exposed residue according to the neural-network algorithm.
- b - A buried residue according to the neural-network algorithm.
- f - A predicted functional residue (highly conserved and exposed).
- s - A predicted structural residue (highly conserved and buried).
- X - Insufficient data - the calculation for this site was performed on less than 10% of the sequences.

**Supplementary Fig.3** Analysis of evolutionarily conserved AXIN1 residues using the ConSurf tool. Analysis is based on the human 862 amino acid isoform of AXIN1 (Uniprot O15169-1).
