# Supplementary material for: Analysis of Tumor-Associated AXIN1 Missense Mutations Identifies Variants That Activate β-Catenin Signaling
Source: PubMed Central journal article supplement — Cancer Res. 2024 Feb 15;84(9):1443–59. doi: 10.1158/0008-5472.CAN-23-2268 (PMC11063763; doi:10.1158/0008-5472.can-23-2268), 2024-02-15
Supplement: can-23-2268_supplementary_figure_4_suppsf4.pdf [file can-23-2268_supplementary_figure_4_suppsf4.pdf]

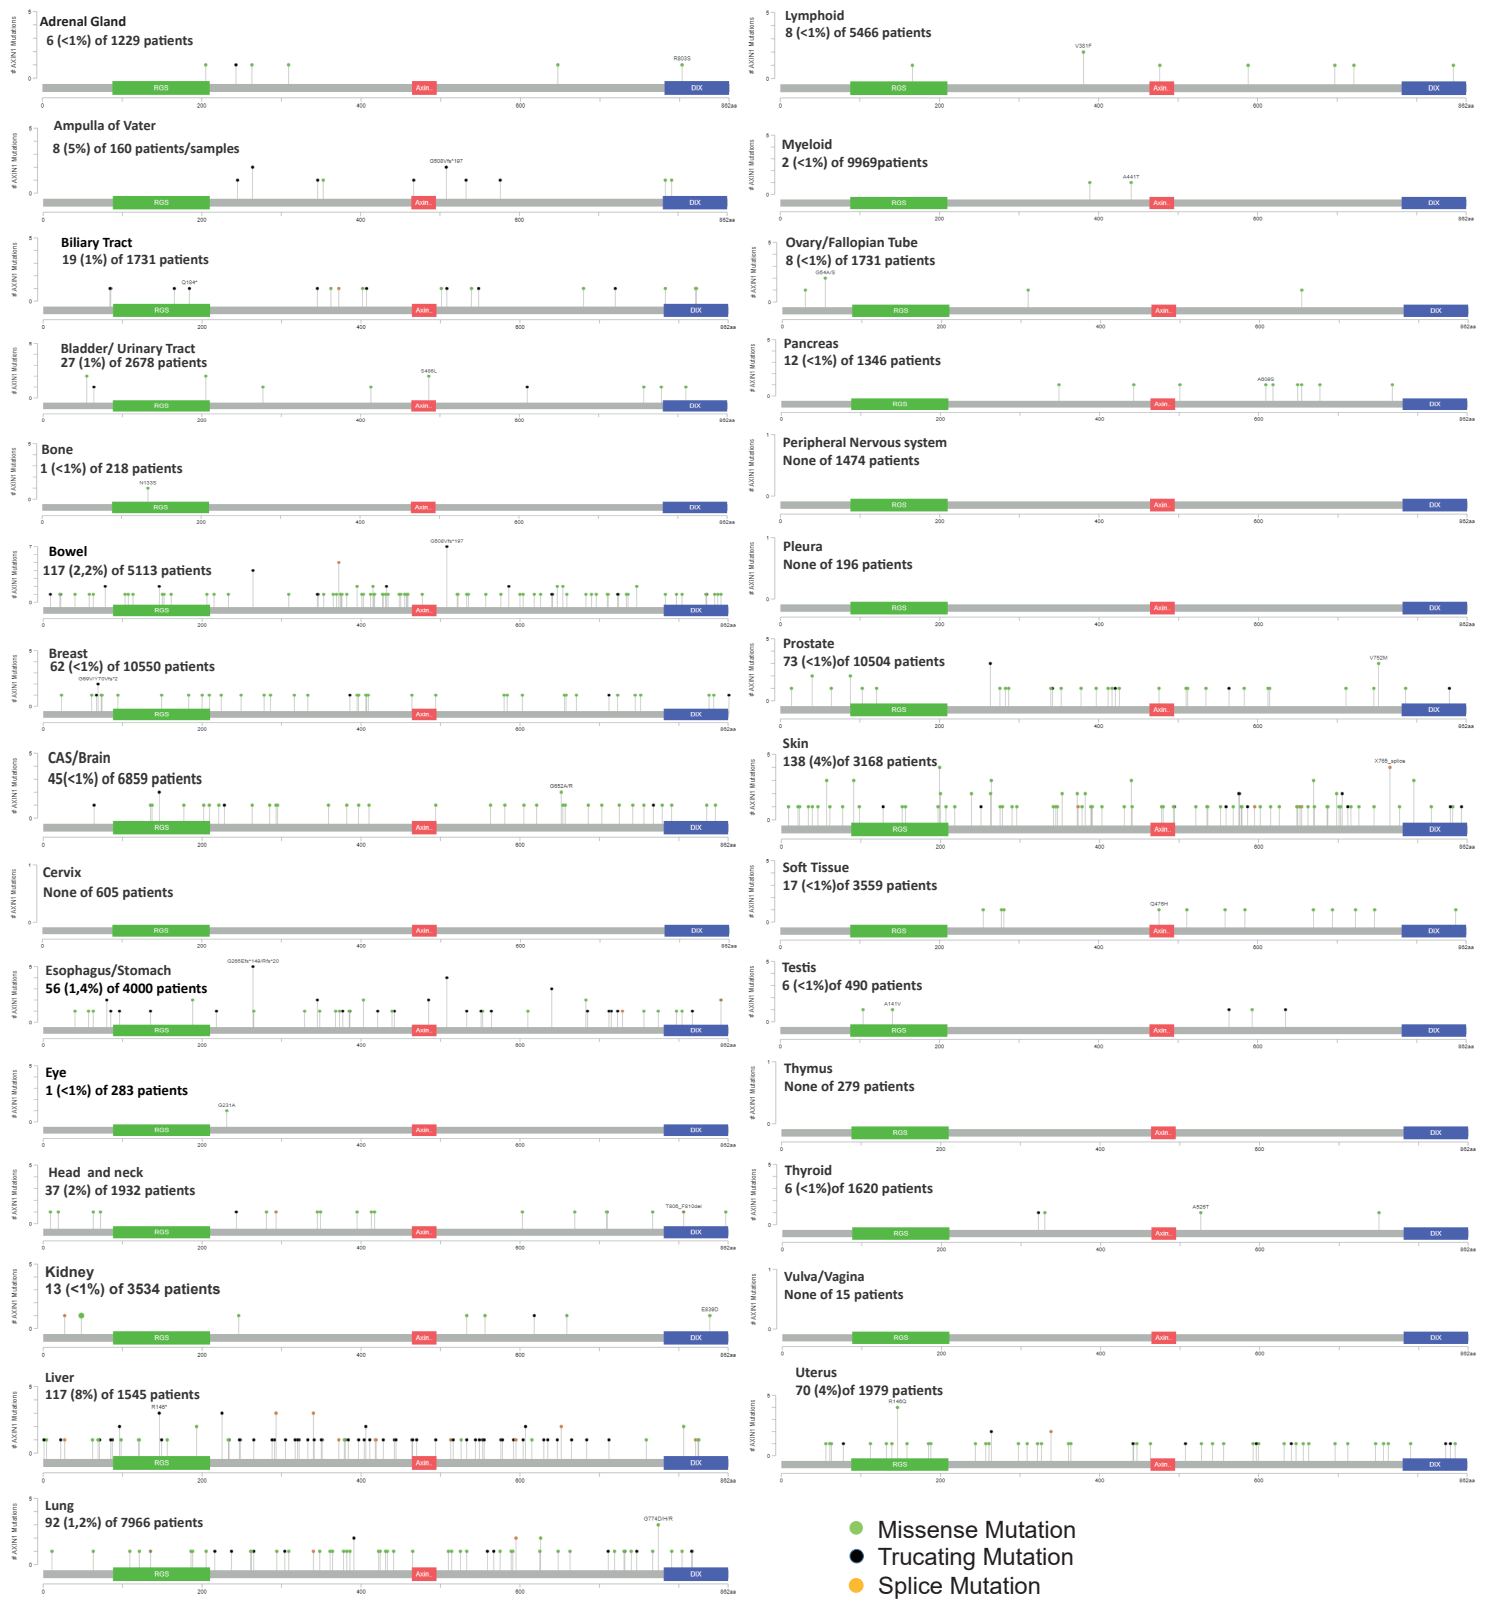

## Supplementary Fig.4

The AXIN1 mutation landscape for various cancer types was obtained from the cBioPortal database (<http://www.cbioportal.org/>). Data are updated until July 2022.
