# Supplementary material for: Analysis of Tumor-Associated AXIN1 Missense Mutations Identifies Variants That Activate β-Catenin Signaling
Source: PubMed Central journal article supplement — Cancer Res. 2024 Feb 15;84(9):1443–59. doi: 10.1158/0008-5472.CAN-23-2268 (PMC11063763; doi:10.1158/0008-5472.can-23-2268), 2024-02-15
Supplement: can-23-2268_supplementary_figure_5_suppsf5.pdf [file can-23-2268_supplementary_figure_5_suppsf5.pdf]

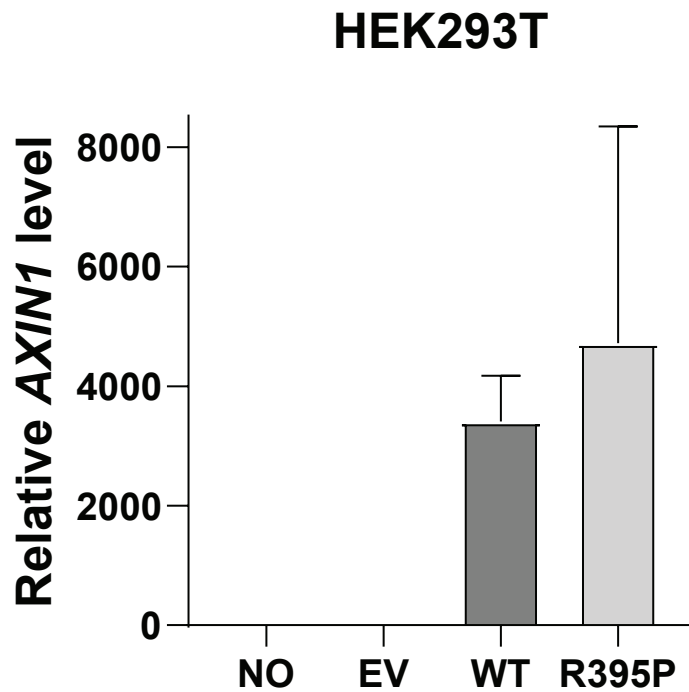

**Supplementary Figure 5. Comparison of overexpressed and endogenous levels of *AXIN1* mRNA.**

In this experiment, 100 ng of plasmid DNA was transfected into HEK293T cells grown in a 24-well plate. Next, a qRT-PCR assay was performed to determine *AXIN1* expression levels. The results demonstrate a remarkable more than 3000-fold increase in *AXIN1* mRNA levels when using the expression plasmids. (in triplicate, n=2 independent experiments). Expression levels are relative to the housekeeping gene *GAPDH*.
