# Supplementary material for: Analysis of Tumor-Associated AXIN1 Missense Mutations Identifies Variants That Activate β-Catenin Signaling
Source: PubMed Central journal article supplement — Cancer Res. 2024 Feb 15;84(9):1443–59. doi: 10.1158/0008-5472.CAN-23-2268 (PMC11063763; doi:10.1158/0008-5472.can-23-2268), 2024-02-15
Supplement: can-23-2268_supplementary_figure_6_suppsf6.pdf [file can-23-2268_supplementary_figure_6_suppsf6.pdf]

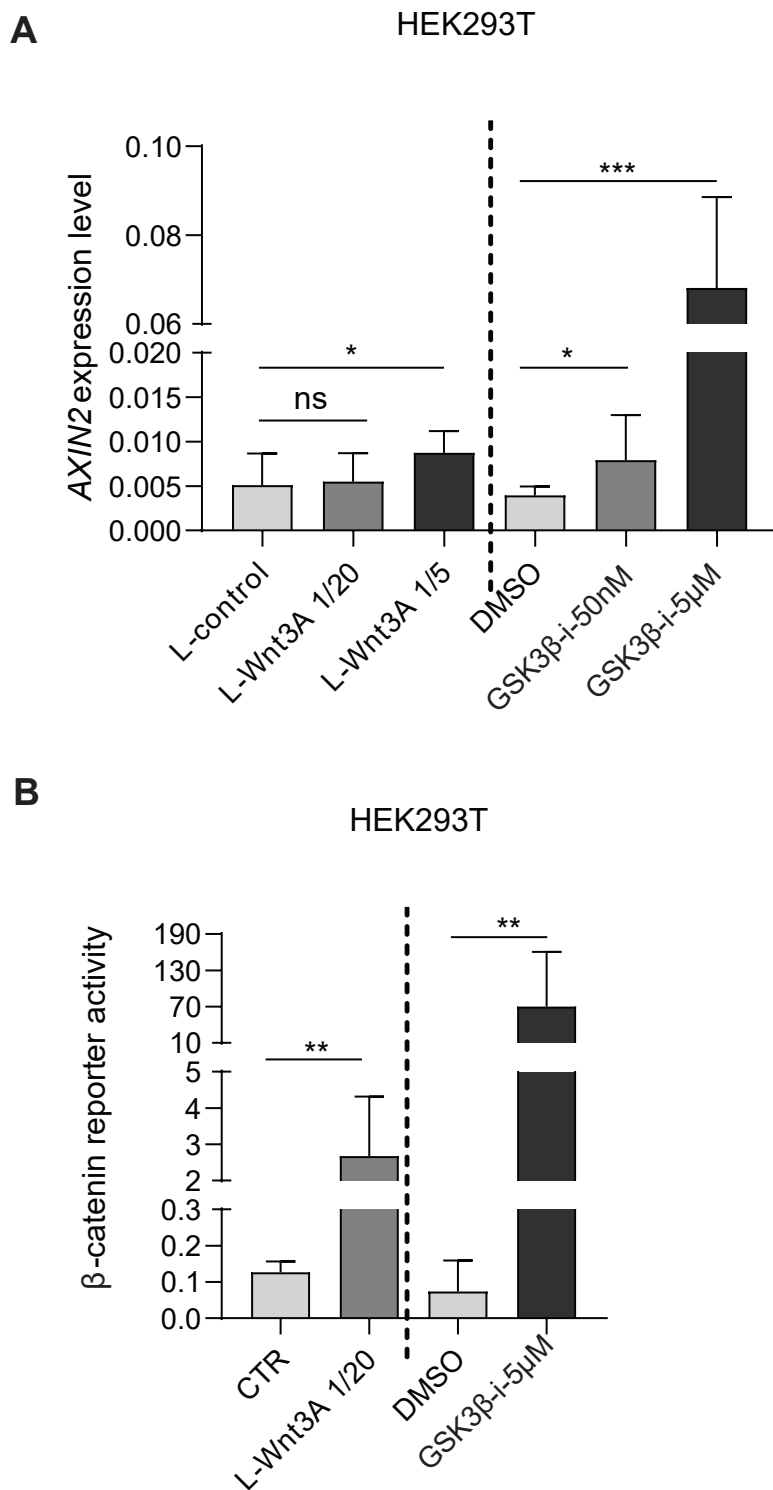

**Supplementary Fig.6** The response of  $\beta$ -catenin in HEK293T cells. (A) QRT-PCR assay indicates that *AXIN2* mRNA levels weakly respond to L-Wnt3A conditioned medium treatment in HEK293T cells (6 replicates). Cells were treated with varying amounts of L-Wnt3A conditioned medium or GSK3 $\beta$  inhibitor (CHIR-9001) for 48 h, and *AXIN2* expression levels were normalized to the housekeeping gene *GAPDH*. (B) A  $\beta$ -catenin reporter assay demonstrates that HEK293T cells are sensitive to  $\beta$ -catenin signaling after L-Wnt3A 1/20 or GSK3 $\beta$  inhibitor (CHIR-9001, 5  $\mu$ M) treatment. The data are presented as mean  $\pm$  SD, and statistical significance for all experiments was determined using a Mann-Whitney test (\* $P$  < 0.05, \*\* $P$  < 0.01, \*\*\* $P$  < 0.001).
