# Supplementary material for: Analysis of Tumor-Associated AXIN1 Missense Mutations Identifies Variants That Activate β-Catenin Signaling
Source: PubMed Central journal article supplement — Cancer Res. 2024 Feb 15;84(9):1443–59. doi: 10.1158/0008-5472.CAN-23-2268 (PMC11063763; doi:10.1158/0008-5472.can-23-2268), 2024-02-15
Supplement: can-23-2268_supplementary_figure_7_suppsf7.pdf [file can-23-2268_supplementary_figure_7_suppsf7.pdf]

**A****HEK293T**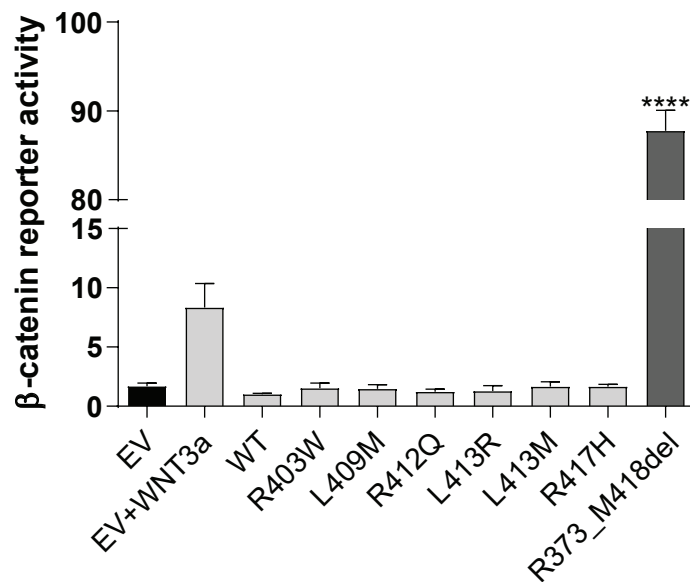**B**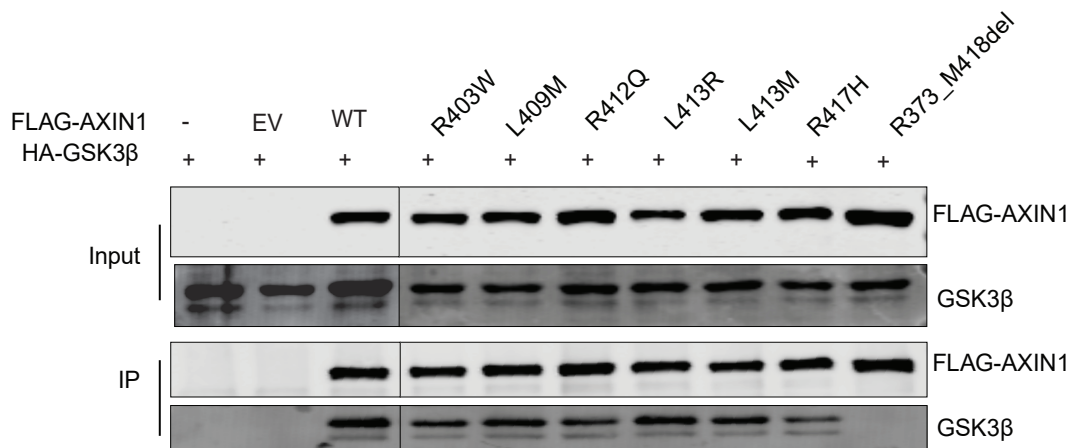

**Supplementary Fig.7** Six additional tumor-associated AXIN1 variants observed at conserved residues directly following the GSK3 $\beta$  domain, were investigated for their ability to affect  $\beta$ -catenin signaling and GSK3 $\beta$  binding. (A) A  $\beta$ -catenin reporter assay shows that all six additional missense variants still preserve the ability to regulate  $\beta$ -catenin levels. Wild-type AXIN1 (WT) and the R373\_M418del variant were included, respectively, as positive and negative controls. The P385A and L396M variants were also included in Figure 4. (B) All variants are capable to efficiently co-precipitate endogenous (lower band) and co-transfected HA-GSK3 $\beta$ , in contrast with the R373\_M418del variant. Two irrelevant lanes have been removed from original blots.
