# Supplementary material for: Analysis of Tumor-Associated AXIN1 Missense Mutations Identifies Variants That Activate β-Catenin Signaling
Source: PubMed Central journal article supplement — Cancer Res. 2024 Feb 15;84(9):1443–59. doi: 10.1158/0008-5472.CAN-23-2268 (PMC11063763; doi:10.1158/0008-5472.can-23-2268), 2024-02-15
Supplement: can-23-2268_supplementary_figure_9_suppsf9.pdf [file can-23-2268_supplementary_figure_9_suppsf9.pdf]

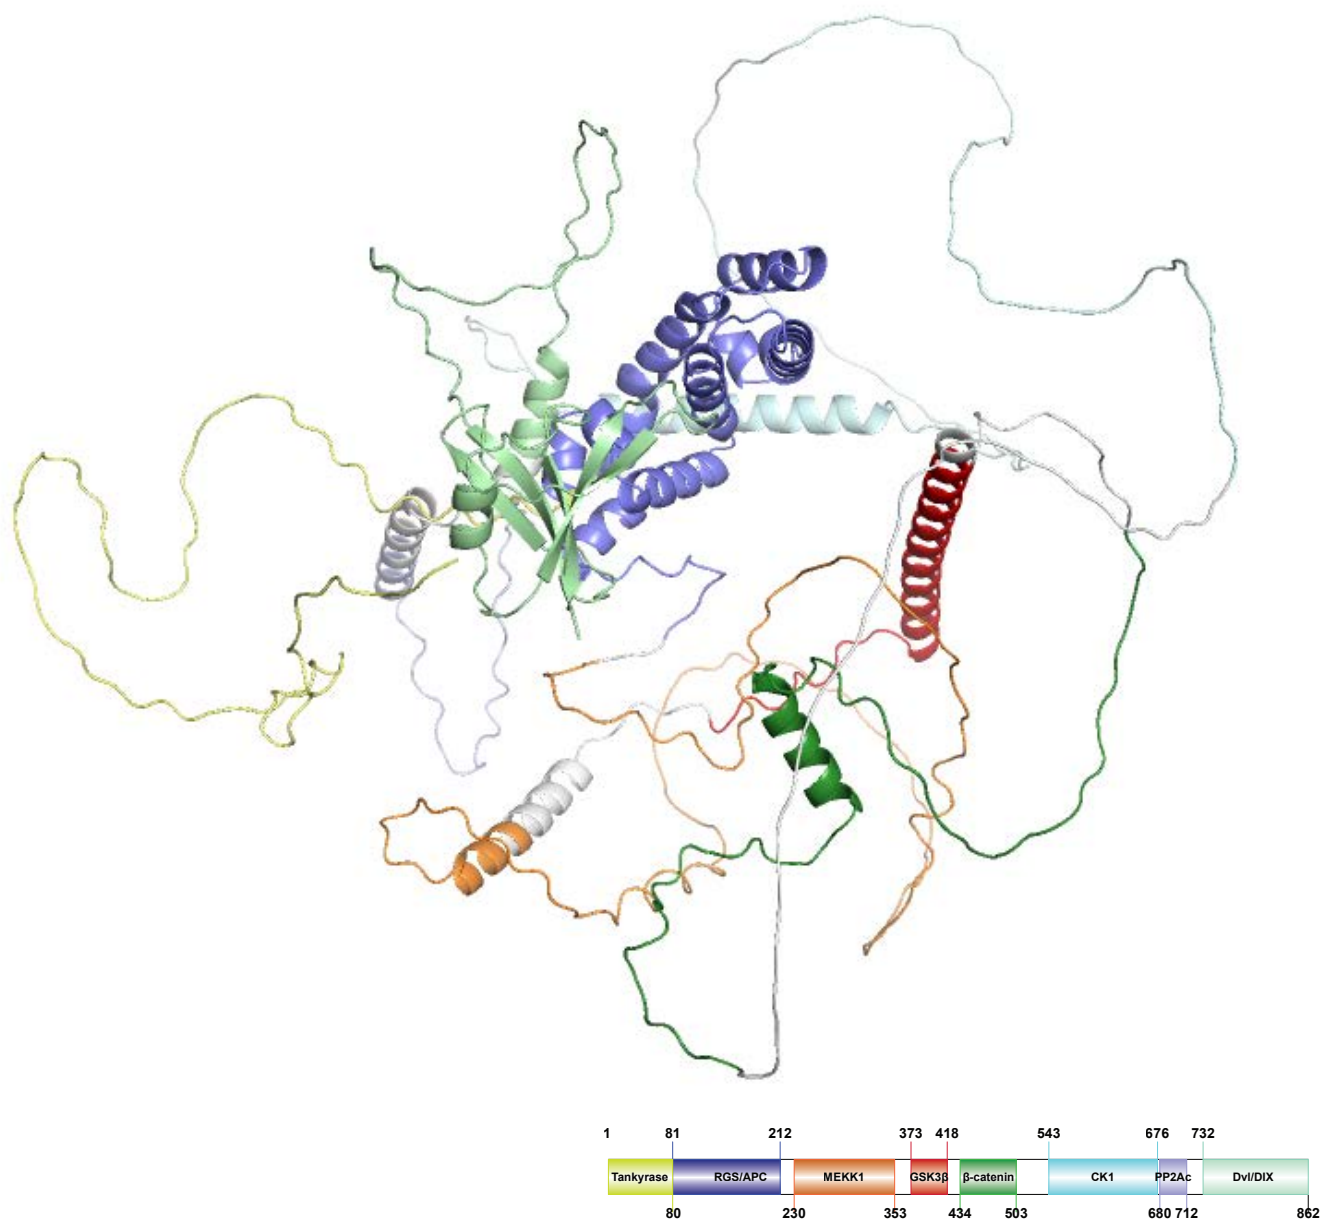

**Supplementary Fig.9** AlphaFold structure prediction for human AXIN1. Residues are color-coded according to the domain boundaries in Figure 1A
