# Supplementary material for: Analysis of Tumor-Associated AXIN1 Missense Mutations Identifies Variants That Activate β-Catenin Signaling
Source: PubMed Central journal article supplement — Cancer Res. 2024 Feb 15;84(9):1443–59. doi: 10.1158/0008-5472.CAN-23-2268 (PMC11063763; doi:10.1158/0008-5472.can-23-2268), 2024-02-15
Supplement: can-23-2268_supplementary_figure_10_suppsf10.pdf [file can-23-2268_supplementary_figure_10_suppsf10.pdf]

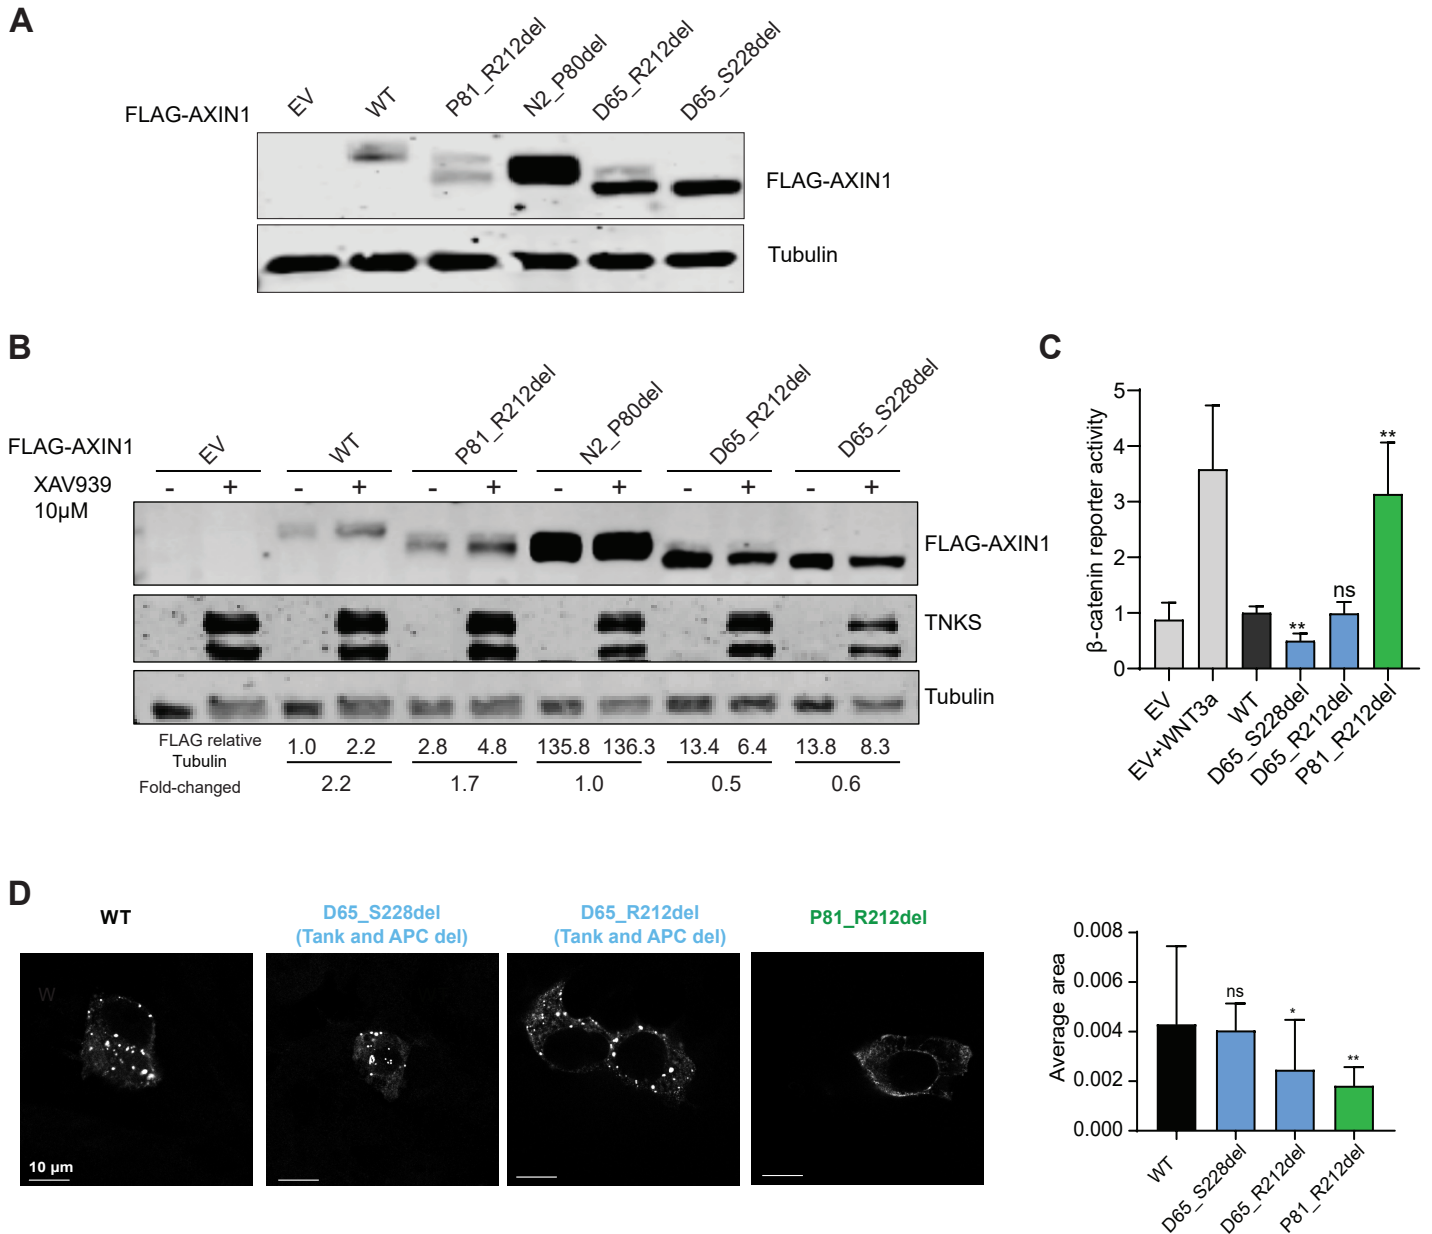

**Supplementary Fig.10** An accurate removal of the RGS/APC binding domain is required to correctly determine the functional consequences of losing this domain. The P81\_R212del and N2\_P80del variants correctly delete the RGS/APC and tankyrase domains, respectively. The D65\_R212del and D65\_S228del variants, besides removing the RGS/APC domain, also remove amino acids essential for tankyrase binding. (A) Deleting the entire or the C-terminal part of the tankyrase domain leads to higher baseline levels of AXIN1. (B) Applying the tankyrase inhibitor XAV939 for 24hrs increased wild-type and P81\_R212del protein levels, but had no effect or even reduced those of others. Accumulation of TNKS1/2 protein levels is used as positive control for the effect of XAV939. (C) A  $\beta$ -catenin reporter assay shows that the accurate removal of the RGS/APC domain leads to increased signaling, while simultaneous removal of part of the tankyrase domain has no effect. (D) Expression of wild-type AXIN1 and both variants lacking part of the tankyrase domain, lead to the formation of clear intracellular puncta. Accurate removal of the RGS/APC domain yields fewer and smaller puncta, and shows a generally more diffuse cytoplasmic pattern. Average dot size was determined using ImageJ software on at least 6 independent cells. Data shown as mean  $\pm$  SD. Statistical significance for all experiments was analyzed using a Mann-Whitney test (\* $P < 0.05$ , \*\* $P < 0.01$ ).
