# Supplementary material for: Analysis of Tumor-Associated AXIN1 Missense Mutations Identifies Variants That Activate β-Catenin Signaling
Source: PubMed Central journal article supplement — Cancer Res. 2024 Feb 15;84(9):1443–59. doi: 10.1158/0008-5472.CAN-23-2268 (PMC11063763; doi:10.1158/0008-5472.can-23-2268), 2024-02-15
Supplement: can-23-2268_supplementary_figure_11_suppsf11.pdf [file can-23-2268_supplementary_figure_11_suppsf11.pdf]

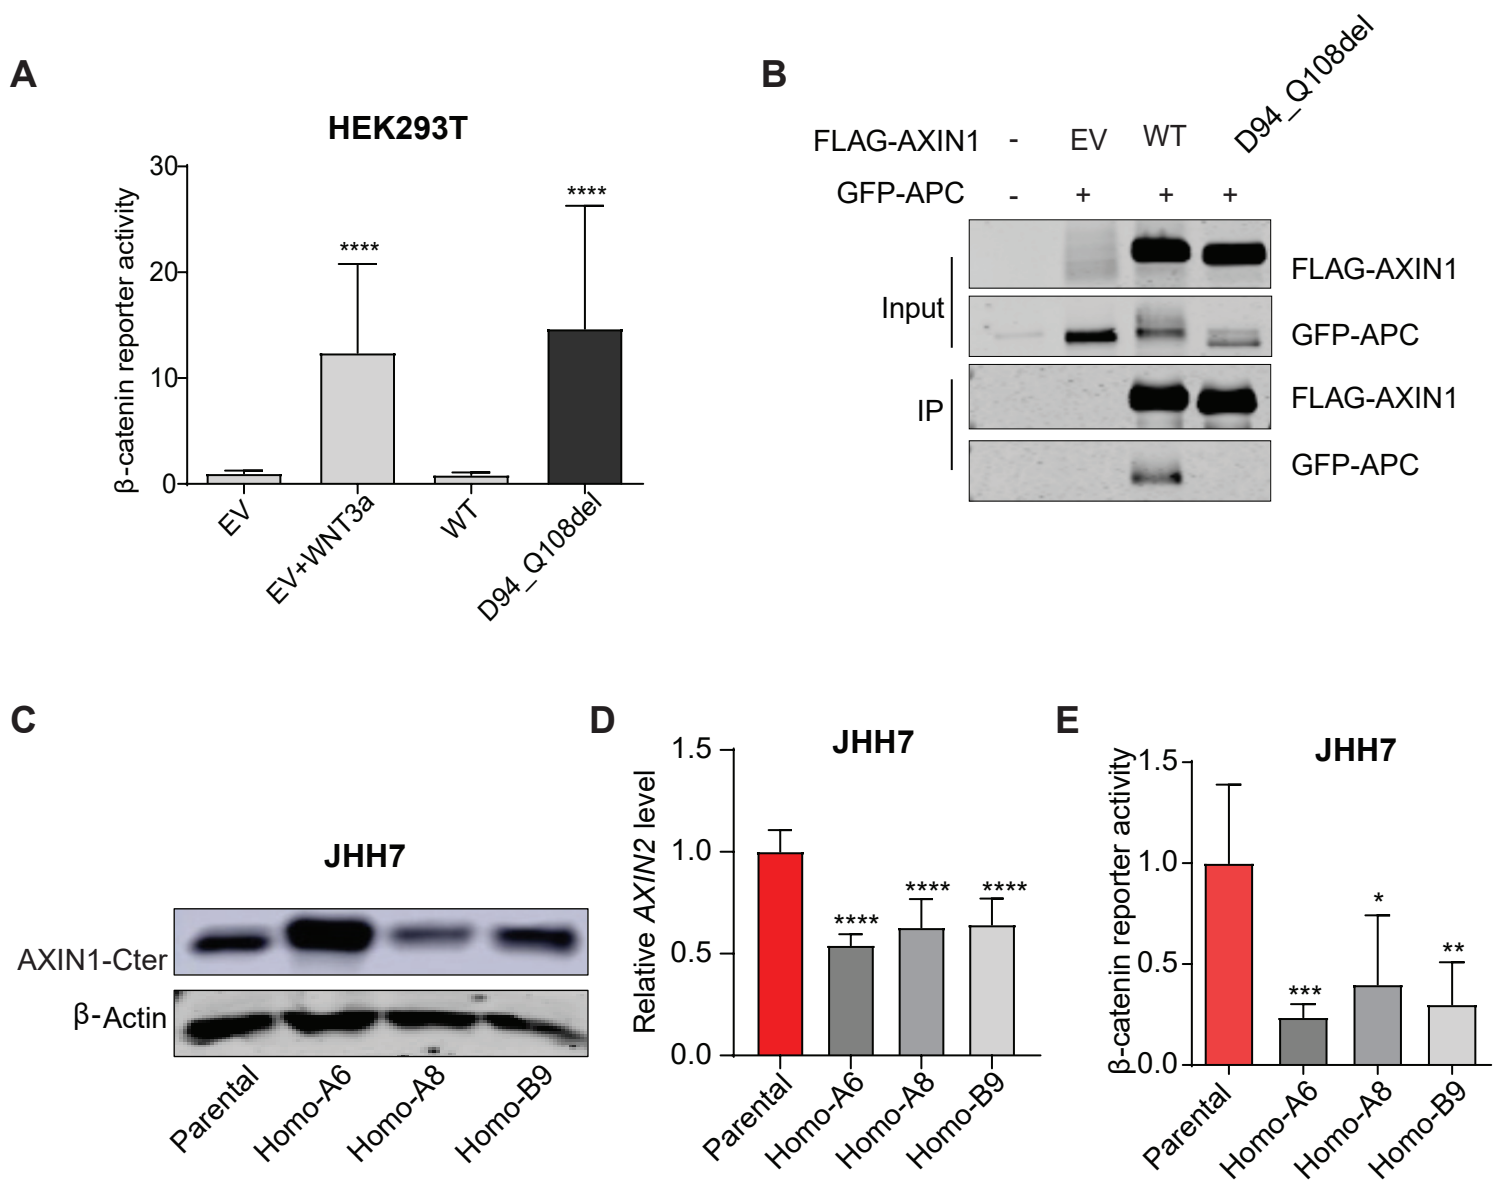

**Supplementary Fig.11** Deleting part of the RGS/APC domain at endogenous levels results in increased  $\beta$ -catenin signaling. To this aim, the homozygous D94\_Q108del deletion present in JHH7 liver cancer cells was corrected using gene editing. (A) A  $\beta$ -catenin reporter assay shows that expression of the D94\_Q108 variant strongly increases signaling, and (B) is unable to co-precipitate GFP-APC. (C) AXIN1 immunoblot of three independent JHH7 clones obtained through Crispr-Cas9 and HDR mediated repair of the original mutation. (D) QRT-PCR assay showing that *AXIN2* mRNA levels are significantly reduced in the AXIN1-repaired JHH7 clones (in triplicate, n=2 independent experiments). Expression levels are relative to the housekeeping gene *GAPDH*. The value for the wild-type control is arbitrarily set to 1. (E) Likewise, a  $\beta$ -catenin reporter assay shows lower levels of signaling in all three repaired clones (in triplicate, n=2 independent experiments). All data shown as mean  $\pm$  SD. Statistical significance for all experiments was analyzed using a Mann-Whitney test (\* $P < 0.05$ , \*\* $P < 0.01$ , \*\*\* $P < 0.001$ , \*\*\*\* $P < 0.0001$ ).
