# Supplementary material for: Analysis of Tumor-Associated AXIN1 Missense Mutations Identifies Variants That Activate β-Catenin Signaling
Source: PubMed Central journal article supplement — Cancer Res. 2024 Feb 15;84(9):1443–59. doi: 10.1158/0008-5472.CAN-23-2268 (PMC11063763; doi:10.1158/0008-5472.can-23-2268), 2024-02-15
Supplement: can-23-2268_supplementary_figure_12_suppsf12.pdf [file can-23-2268_supplementary_figure_12_suppsf12.pdf]

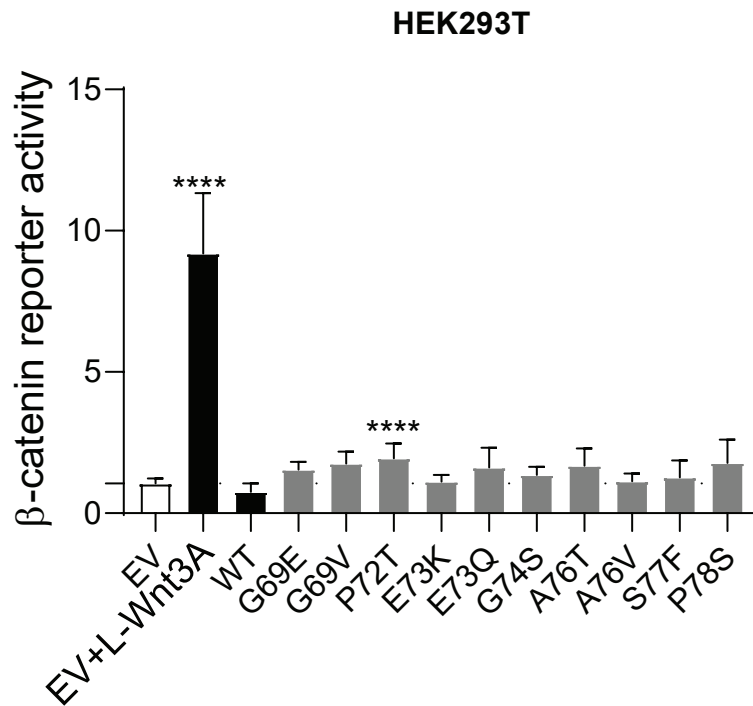

**Supplementary Fig.12** We investigated ten additional tumor-associated AXIN1 variants located at conserved residues within the C-terminal part of the Tankyrase domain for their ability to impact  $\beta$ -catenin signaling. We represented all  $\beta$ -catenin reporter activities as WRE/CMV-Renilla ratios (in triplicate,  $n=3$  independent experiments), with the value obtained for the empty vector (EV) arbitrarily set to 1. All data are shown as mean  $\pm$  SD. Statistical significance for all experiments was analyzed using a Mann-Whitney test (\*\*\*\* $P<0.0001$ ).
