# Supplementary material for: Analysis of Tumor-Associated AXIN1 Missense Mutations Identifies Variants That Activate β-Catenin Signaling
Source: PubMed Central journal article supplement — Cancer Res. 2024 Feb 15;84(9):1443–59. doi: 10.1158/0008-5472.CAN-23-2268 (PMC11063763; doi:10.1158/0008-5472.can-23-2268), 2024-02-15
Supplement: can-23-2268_supplementary_figure_13_suppsf13.pdf [file can-23-2268_supplementary_figure_13_suppsf13.pdf]

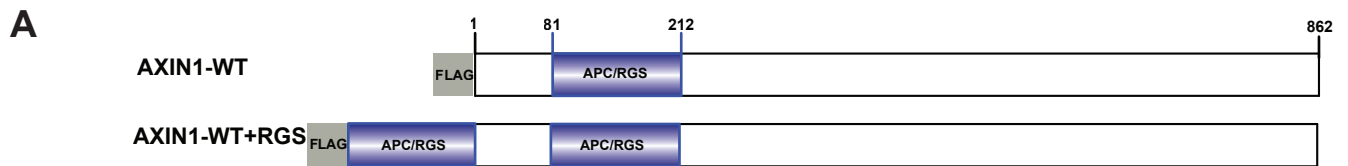

**B**

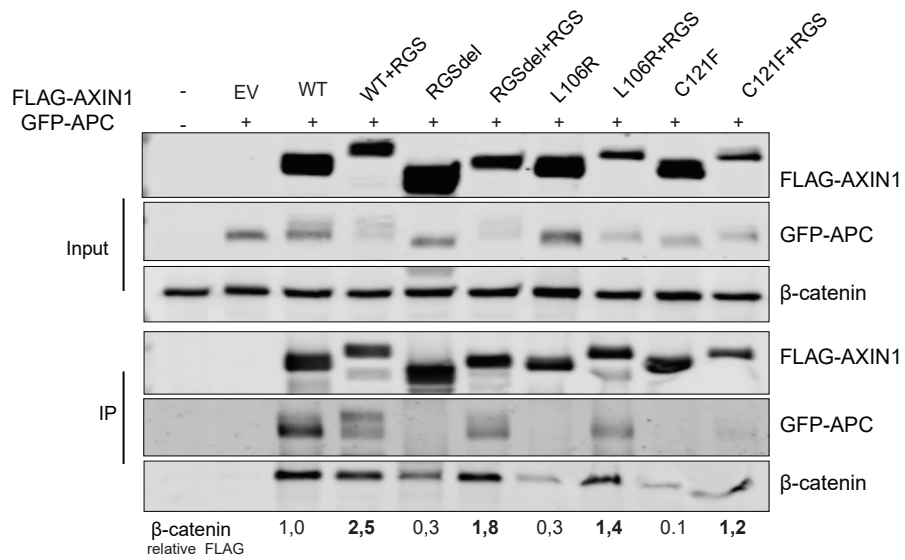

**C**

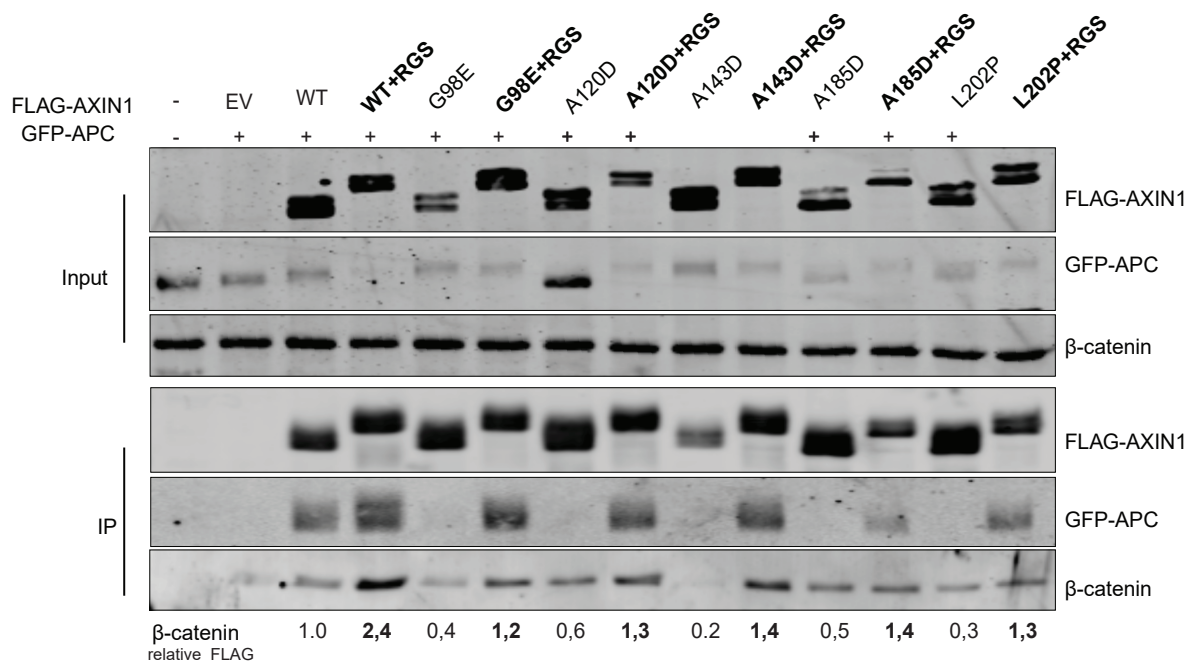

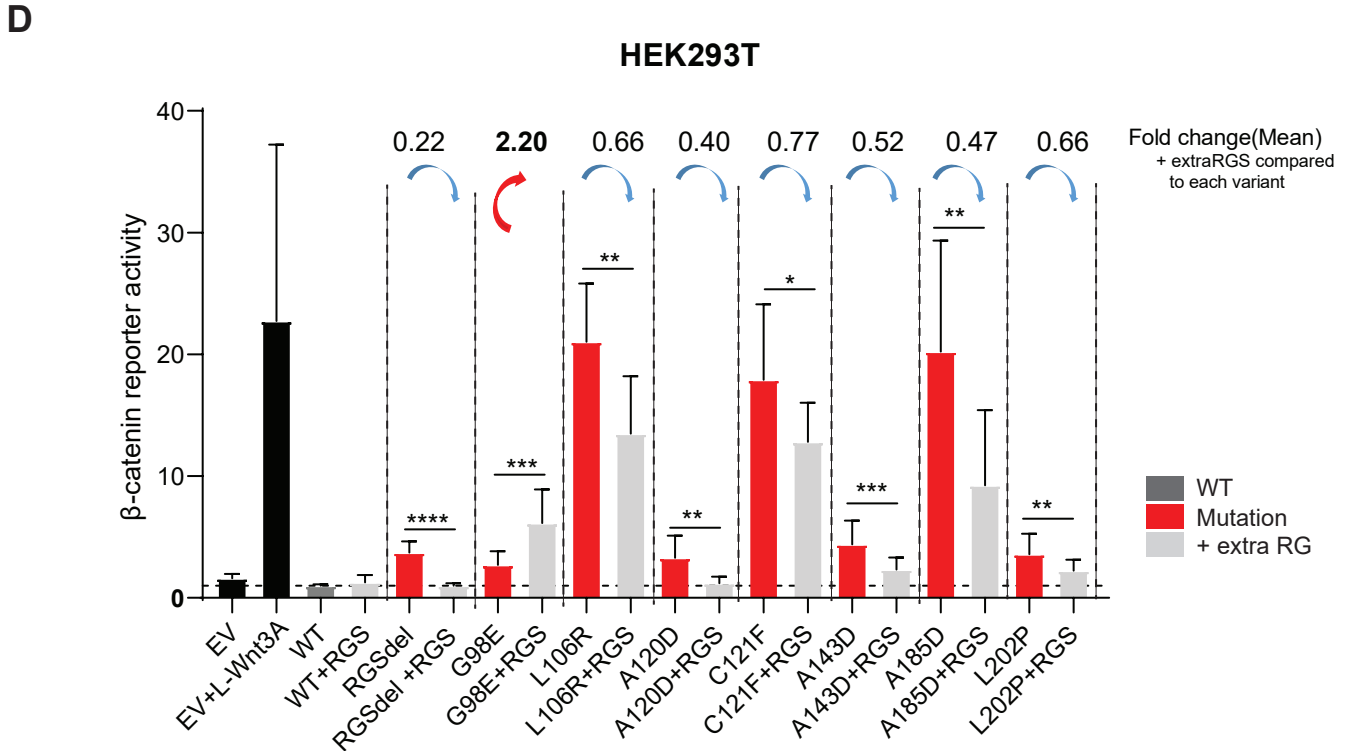

**Supplementary Fig.13 Page 2**

Addition of an extra RGS/APC domain restores APC and  $\beta$ -catenin binding to selected RGS/APC domain variants, and (partially) restores  $\beta$ -catenin regulation. (A) Schematic diagram showing the extra RGS/APC inserted before the tankyrase domain and directly following the N-terminal FLAG-tag. (B,C) Immunoprecipitation experiment showing that the extra RGS/APC domain results in restoration of binding to co-transfected GFP-APC and endogenous  $\beta$ -catenin for all investigated variants. (D) A  $\beta$ -catenin reporter assay investigating the  $\beta$ -catenin regulatory properties of AXIN1 RGS/APC variants with/without an extra RGS/APC domain. The extra RGS domain restores  $\beta$ -catenin regulation of  $\Delta$ RGS-AXIN1 and all moderate variants (A120D, A143D and L202P), with the exception of G98E that shows an unexplained increase in signaling. Three variants with a stronger impact on  $\beta$ -catenin signaling (L106R, C121F and A185D), all show a significant reduction in  $\beta$ -catenin reporter activity, but no restoration to wild-type levels (in triplicate, n=2 independent experiments). All data shown as mean  $\pm$  SD. Statistical significance for all experiments was analyzed using a Mann-Whitney test (\* $P < 0.05$ , \*\* $P < 0.01$ , \*\*\* $P < 0.001$ , \*\*\*\* $P < 0.0001$ ).
