# Supplementary material for: Analysis of Tumor-Associated AXIN1 Missense Mutations Identifies Variants That Activate β-Catenin Signaling
Source: PubMed Central journal article supplement — Cancer Res. 2024 Feb 15;84(9):1443–59. doi: 10.1158/0008-5472.CAN-23-2268 (PMC11063763; doi:10.1158/0008-5472.can-23-2268), 2024-02-15
Supplement: can-23-2268_supplementary_figure_14_suppsf14.pdf [file can-23-2268_supplementary_figure_14_suppsf14.pdf]

**A**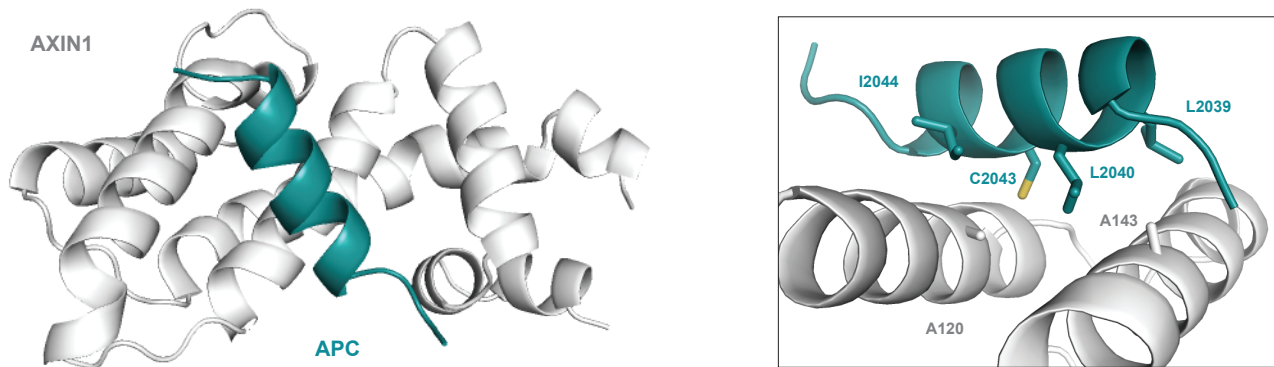**B**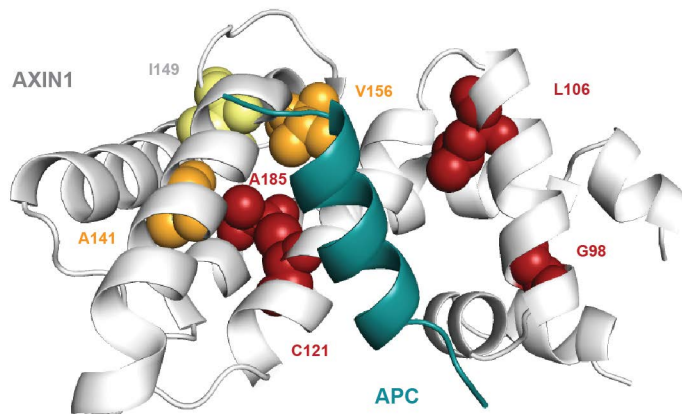

**Supplementary Fig. 14** (A) Cartoon representation of AXIN1 (gray) with bound APC helix (deepteal). Close up of binding interface between AXIN1 and APC. The sidechain of residues Alanine 120 and Alanine 143 on the interface of AXIN1 are shown in stick representation, pointing towards the hydrophobic interface formed by Leucine 2039, Leucine 2040, Cystein 2043 (with sulfur in yellow) and Isoleucine 2044 on APC. (B) Cartoon representation of AXIN1 (gray) with bound APC helix (deepteal). Amino acid residues mutated in this study that are located in the hydrophobic core of AXIN1 are indicated with spheres and colored according to extent of loss of APC binding (see figure 5B) with yellow indicating no loss, orange indicating partial loss and red indicating near-complete loss of APC binding.
