# Supplementary material for: Analysis of Tumor-Associated AXIN1 Missense Mutations Identifies Variants That Activate β-Catenin Signaling
Source: PubMed Central journal article supplement — Cancer Res. 2024 Feb 15;84(9):1443–59. doi: 10.1158/0008-5472.CAN-23-2268 (PMC11063763; doi:10.1158/0008-5472.can-23-2268), 2024-02-15
Supplement: can-23-2268_supplementary_figure_15_suppsf15.pdf [file can-23-2268_supplementary_figure_15_suppsf15.pdf]

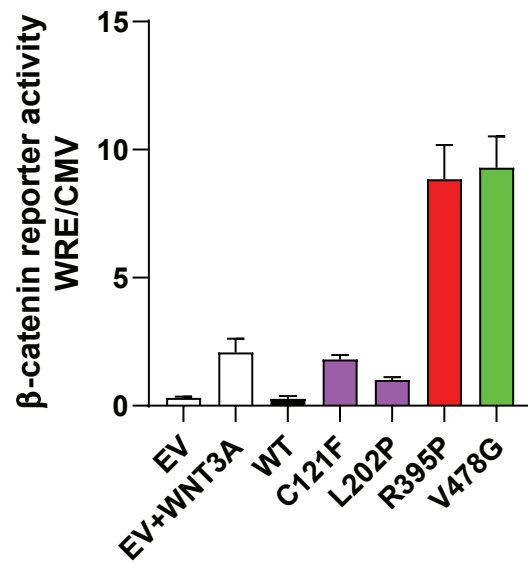

**Supplementary Fig.15** Representative mutations of the RGS/APC (C121F, L202P), GSK3 $\beta$  (R395P) and  $\beta$ -catenin interaction (V478G) domains were investigated in a direct side-by-side comparison for their ability to affect  $\beta$ -catenin signaling. We represented all  $\beta$ -catenin reporter activities as WRE/CMV-Renilla ratios.
