# Supplementary material for: Analysis of Tumor-Associated AXIN1 Missense Mutations Identifies Variants That Activate β-Catenin Signaling
Source: PubMed Central journal article supplement — Cancer Res. 2024 Feb 15;84(9):1443–59. doi: 10.1158/0008-5472.CAN-23-2268 (PMC11063763; doi:10.1158/0008-5472.can-23-2268), 2024-02-15
Supplement: can-23-2268_supplementary_table3_suppst3.pdf [file can-23-2268_supplementary_table3_suppst3.pdf]

**Supplementary Table 3. Overview of the interactions at the interface between AXIN1 and GSK3 $\beta$  for the mutated amino acids and their predicted effects.**

| Amino acid change in AXIN1 | Located at interface                                                    | Original interaction of side chain                                                                                    | Predicted effect of amino acid change                                                                                                                                                                                                             | Expected effect on complex formation                           |
|----------------------------|-------------------------------------------------------------------------|-----------------------------------------------------------------------------------------------------------------------|---------------------------------------------------------------------------------------------------------------------------------------------------------------------------------------------------------------------------------------------------|----------------------------------------------------------------|
| P385A                      | Yes, at edge                                                            | C $\beta$ carbon of Proline 385 in AXIN1 makes weak vdWaals interaction with ring of Phe291 of GSK3 $\beta$ at 4.0 Å. | C $\beta$ carbon of Alanine will still make the same vdWaals interaction with Phe291 of GSK3 $\beta$ .                                                                                                                                            | None                                                           |
| Q386H                      | Not really, on the side at the surface, and points away from interface  | Weak vdWaals with ring of Phe291 at 3.8 Å                                                                             | Histidine can easily be accommodated on the surface                                                                                                                                                                                               | None                                                           |
| A389V                      | Yes, in hydrophobic cluster with Tyr288, Phe291, Phe293 of GSK3 $\beta$ | vdWaals interactions with ring of Phe291 at 3.6-3.8 Å                                                                 | There is space available around the Alanine 389 sidechain to accommodate the extra carbons of Valine with only minor adjustments of the side chain positions of surrounding residues in GSK3 $\beta$                                              | Minor                                                          |
| E391K                      | On the side at the surface                                              | vdWaals with Valine263 in GSK3 $\beta$ at 3.6-3.8 Å                                                                   | At surface so lysine can easily be accommodated and could make same vdWaals interaction                                                                                                                                                           | None                                                           |
| H394N                      | No, at opposite side of helix                                           | None, points away into solution                                                                                       | Polar asparagine would similarly point away into solution                                                                                                                                                                                         | None                                                           |
| R395H                      | Yes, at the side on the surface                                         | Salt-bridge (ion-pair and hydrogen bond) with Asp264 on GSK3 $\beta$                                                  | Histidine can be accommodated at surface, is also positively charged so ion-pair still possible but weaker due to shorter side chain. Hydrogen bond with Asp264 can no longer be formed.                                                          | Small effect expected due to loss of hydrogen bond at surface. |
| R395P                      | Idem                                                                    | Idem                                                                                                                  | Loss of surface salt bridge with Asp264. A Proline in the middle of the AXIN1 $\alpha$ -helix will distort the helix and force rearrangements of atoms surrounding this region including the hydrophobic interface between AXIN1 and GSK3 $\beta$ | Large                                                          |
| R395C                      | Idem                                                                    | Idem                                                                                                                  | Cysteine can be accommodated at the surface but the salt-bridge interaction with Asp264 will be lost                                                                                                                                              | Small effect due to loss of surface salt-bridge                |
| L396M                      | Yes, in hydrophobic cluster with Val267, Ile270, Pro294 and Ile296      | vdWaals interactions with surrounding hydrophobic residues                                                            | There is space available in the hydrophobic cluster to accommodate the Methionine side chain which is also largely hydrophobic                                                                                                                    | Minor                                                          |
| R401C                      | Not in structure                                                        |                                                                                                                       |                                                                                                                                                                                                                                                   |                                                                |
| R401H                      | Not in structure                                                        |                                                                                                                       |                                                                                                                                                                                                                                                   |                                                                |
| T402K                      | Not in structure                                                        |                                                                                                                       |                                                                                                                                                                                                                                                   |                                                                |
