# Supplementary material for: Analysis of Tumor-Associated AXIN1 Missense Mutations Identifies Variants That Activate β-Catenin Signaling
Source: PubMed Central journal article supplement — Cancer Res. 2024 Feb 15;84(9):1443–59. doi: 10.1158/0008-5472.CAN-23-2268 (PMC11063763; doi:10.1158/0008-5472.can-23-2268), 2024-02-15
Supplement: can-23-2268_supplementary_table_1_suppst1.pdf [file can-23-2268_supplementary_table_1_suppst1.pdf]

**Supplementary Table 1. Primer sequences****a:Primer sequences used for generating deleted variants**

| <b>Primer name</b>        | <b>oligos sequences</b>     |
|---------------------------|-----------------------------|
| FlagAXIN1-2_80del-R2      | CATAGATCCGCCCGGGCT          |
| FlagAXIN1-2_80del-R3      | CATAGATCCGCCCGGGCTCTTAT     |
| AXIN1-delD94Q108-F        | GGGCTGTGCCGACTTGCT          |
| AXIN1-delD94Q108-R        | TCCAGCAGGGAATGCAGTG         |
| Flag-AXIN1-DELE 65-227-F  | CGAGCGCCTCGGAGTGCC          |
| Flag-AXIN1-DELE 65-227-R  | AGGGAGATGCAGGAGAGC          |
| Flag-AXIN1-DELE 230-353-F | CCCTGACCCAGAGCTCTG          |
| Flag-AXIN1-DELE 230-353-R | GTGGCACTGGGGGGTGCC          |
| Flag-AXIN1-DELE 434-503-F | GTGGCACTGGGGGGTGCC          |
| Flag-AXIN1-DELE 434-503-R | CCCTGGGGGCCCTGACGA          |
| Flag-AXIN1-DELE 543-676-F | GCTGTGGTGGACGTGGTG          |
| Flag-AXIN1-DELE 543-676-R | CGTCTGGAGGAGGAAGAAAAGAGAGCC |
| Flag-AXIN1-DELE 680-712-F | GAGCTGAGGGCCGGCCCA          |
| Flag-AXIN1-DELE 680-712-R | TAAGTCGACCTCGAGGGG          |
| Flag-AXIN1-DELE 732-862-F | CACATACCTCTGCTTGAG          |
| Flag-AXIN1-DELE 732-862-R | TGTGTGGACATGGGCTGTGCC       |
| Flag-AXIN1-DELE 373-418-F | GGGAATGTGAGGTAGGGG          |
| Flag-AXIN1-DELE 373-418-R | GTGCAGCGCACGCGGGAGGCCGA     |
| Flag-AXIN1-DELE 373-383-F | GGGAATGTGAGGTAGGGG          |

|                           |                                |
|---------------------------|--------------------------------|
| Flag-AXIN1-DELE 373-383-R | CACCGCCTGGAGGCTGTG             |
| Flag-AXIN1-DELE 383-393-F | GCGGACCTCCTTCGGCAC             |
| Flag-AXIN1-DELE 383-393-R | CGGGAGGCCGAGGAGAAG             |
| Flag-AXIN1-DELE 393-402-F | GAGCTCCTCCGCGAACTTC            |
| Flag-AXIN1-DELE 393-402-R | GAGGAGGAAGGTGAGGACGG           |
| Flag-AXIN1-DELE 402-418-F | GCGCTGCACAGCCTCCAG             |
| Flag-AXIN1-DELE 402-418-R | GTGGAGCCTCACAAGTTCGCGGAG       |
| Flag-AXIN1-DELE 434-450-F | CCCTGGGGGCCCTGACGA             |
| Flag-AXIN1-DELE 434-450-R | GAGAGCATCCTGGACGAGCAC          |
| Flag-AXIN1-DELE 450-467-F | GGGCGGGAAGTGGTGCCA             |
| Flag-AXIN1-DELE 450-467-R | TCGCCTGGGCCTGGCCAT             |
| Flag-AXIN1-DELE 467-485-F | GTTCTCCTCGTGTGCATCCCGG         |
| Flag-AXIN1-DELE 467-485-R | GTGGCACTGGGGGGTGCC             |
| Flag-AXIN1-DELE 485-503-F | GCGGCCAGGTGTCCTCAG             |
| Flag-AXIN1-DELE 485-503-R | TATCCAGTGATGCGCTGACG           |
| Axin1-del81-212-F         | ACAGGCTCGGAGAGCCCC             |
| Axin1-del81-212-R         | TGGGGTGGGGGAGGCACT             |
| Axin1-del81-147-F         | TACATTCTTGATAACAATGGCATCGTGCCC |
| Axin1-del147-212-R        | TCGGTAGATGGCTCTCGCC            |
| deFlagAxin1-1-430F        | CCCCCAGGGCCGTGTCAC             |
| deFlagAxin1-1-430R        | CGGGCTTTATCGTCGTCATCC          |

**b:Primers sequences used for generating cancer-related AXIN1 variants**

| <b>Primer name</b>  | <b>oligos sequences</b>       |
|---------------------|-------------------------------|
| Flag-AXIN1-P385A-F  | CTCCTTCGGCACCCGGTA            |
| Flag-AXIN1-P385A-R  | AGCTCATCCACTGCCTGGAGGC        |
| Flag-AXIN1-Q386H-F  | GCGGACCTCCTTCGGCAC            |
| Flag-AXIN1-Q386H-R  | TCAGAAGTTCGTGGAGGAGCTCATCC    |
| Flag-AXIN1-A389V-F  | GGCTCCACGCGGACCTCC            |
| Flag-AXIN1-A389V-R  | AGTTCGCGGAGAAGCTCATCCAC       |
| Flag-AXIN1-E391K-F  | TCTGAGGCTCCACGCGGA            |
| Flag-AXIN1-E391K-R  | AGGAGCTCATCAACCGCCTGGAG       |
| Flag-AXIN1-H394N-F  | CCGCGAACTTCTGAGGCTC           |
| Flag-AXIN1-H394N-R  | GCTCATCCACCACCTGGAGGCTG       |
| Flag-AXIN1-R395H-F  | TCCTCCGCGAACTTCTGAG           |
| Flag-AXIN1-R395H-R  | GCTCATCCACCCCTGGAGGCTG        |
| Flag-AXIN1-R395P-F  | TCCTCCGCGAACTTCTGAG           |
| Flag-AXIN1-R395P-R  | AGGCTGTGCAGTGCACGCGGGAG       |
| Flag-AXIN1-R395C-4F | AGCCTCCAGGCAGTGGATGAGCTCCTCCG |
| Flag-AXIN1-R395C-4R | GAGCCTCAGAAGTTCGCG            |
| Flag-AXIN1-L396M-F  | GTCCTCCGCGAACTTCTGAGG         |
| Flag-AXIN1-L396M-R  | GCAGCGCACGTGGGAGGCCGA         |
| Flag-AXIN1-R401C-F  | CCAGGCGGTGGATGAGCTCC          |
| Flag-AXIN1-R401C-R  | GGCTGTGCAGCACACGCGGGAGG       |
| Flag-AXIN1-R401H-F  | TCCAGGCGGTGGATGAGCTC          |

|                     |                            |
|---------------------|----------------------------|
| Flag-AXIN1-R401H-R  | TGTGCAGCGCAAGCGGGAGGCCG    |
| Flag-AXIN1-T402 K-F | GCCTCCAGGCGGTGGATGAGC      |
| Flag-AXIN1-T402 K-R | TCAGGGACAGGGAAGGGCATATC    |
| Flag-AXIN1-R403W-F  | ACAGCCTCCAGGCGGTGGATG      |
| Flag-AXIN1-R403W-R  | CCGAGGAGAAGATGGAGGAGCGG    |
| Flag-AXIN1-L409M-F  | CCTCCCGCGTGCGCTGCA         |
| Flag-AXIN1-L409M-R  | GCTGGAGGAGCAGCTGAAGCGCGT   |
| Flag-AXIN1-R412Q-F  | TTCTCCTCGGCCTCCCGC         |
| Flag-AXIN1-R412Q-R  | TGGAGGAGCGGATGAAGCGCGTG    |
| Flag-AXIN1-R413M-F  | GCTTCTCCTCGGCCTCCCG        |
| Flag-AXIN1-L413M-R  | GGAGGAGCGGCGGAAGCGCGTGC    |
| Flag-AXIN1-L413R-F  | AGCTTCTCCTCGGCCTCCCG       |
| Flag-AXIN1-L413R-R  | GAAGCGCGTGCACATGGAGGAGG    |
| Flag-AXIN1-R417H-F  | AGCCGCTCCTCCAGCTTC         |
| Flag-AXIN1-R417H-R  | GAGGAGGAAGGTGAGGAC         |
| Flag-AXIN1-R450-R   | TGGTGCCAAGCGGGGGCG         |
| Flag-AXIN1-R450H-F  | CTTCCCGCCCCACTGTGTGGACATGG |
| Flag-AXIN1-R450L-F  | CTTCCCGCCCCTCTGTGTGGACATGG |
| Flag-AXIN1-G455V-F  | TGTGGACATGGTCTGTGCCGGGC    |
| Flag-AXIN1-G455V-R  | CAGCGGGGCGGGAAGTGG         |
| Flag-AXIN1-A457P-F  | ACATGGGCTGTCCCGGGCTCCGG    |
| Flag-AXIN1-A457P-R  | CCACACAGCGGGGCGGGAAG       |

|                     |                                    |
|---------------------|------------------------------------|
| Flag-AXIN1-G458R-F  | TGGGCTGTGCCAGGCTCCGGGAT            |
| Flag-AXIN1-G458R-R  | TGTCCACACAGCGGGGCG                 |
| Flag-AXIN1-L459F-F  | GCTGTGCCGGGTTCCGGGATGCA            |
| Flag-AXIN1-L459F-R  | CCATGTCCACACAGCGGGGC               |
| Flag-AXIN1-D461N-F  | CCGGGCTCCGGAATGCACACGAG            |
| Flag-AXIN1-D461N-R  | CACAGCCCATGTCCACACAGC              |
| Flag-AXIN1-A462T-F  | GGCTCCGGGATACACACGAGGAG            |
| Flag-AXIN1-A462T-R  | CGGCACAGCCCATGTCCA                 |
| Flag-AXIN1-E464K-F  | GGGATGCACACAAGGAGAACCCTGAGAGC      |
| Flag-AXIN1-E464K-R  | GGAGCCCGGCACAGCCCA                 |
| Flag-AXIN1-E464D-F  | GATGCACACGATGAGAACCCTGAGAGCATCCTGG |
| Flag-AXIN1-E464D-R  | CCGGAGCCCGGCACAGCC                 |
| Flag-AXIN1-N466Y-F  | CACACGAGGAGTACCCTGAGAGCATCC        |
| Flag-AXIN1-N466Y-R  | CATCCCGGAGCCCGGCAC                 |
| Flag-AXIN1-Q476K-F  | ACGAGCACGTAAAGCGTGTGCTG            |
| Flag-AXIN1-Q476K-R  | CCAGGATGCTCTCAGGGTTC               |
| Flag-AXIN1-V478G-F2 | ACAGCGTGGGCTGAGGACAC               |
| Flag-AXIN1-V478G-R2 | ACGTGCTCGTCCAGGATGC                |
| Flag-AXIN1-P482H-F  | GCTGAGGACACATGGCCGCCAGT            |
| Flag-AXIN1-P482H-R  | ACACGCTGTACGTGCTCGTCC              |
| Flag-AXIN1-G483S-F  | TGAGGACACCTAGCCGCCAGTCG            |
| Flag-AXIN1-G483S-R  | GCACACGCTGTACGTGCTC                |

|               |                            |
|---------------|----------------------------|
| AXIN1-S88P-F  | GTGGGCTGAGCCACTGCATTCCC    |
| AXIN1-S88P-R  | TTCAAGTATGGTGGGGTGG        |
| AXIN1-H90Y-F  | TGAGTCACTGTATTCCCTGCTGG    |
| AXIN1-H90Y-R  | GCCCACTTCAAGTATGGTG        |
| AXIN1-S91F-F  | GTCACTGCATTTTCTGCTGGATG    |
| AXIN1-S91F-R  | TCAGCCCACTTCAAGTATG        |
| AXIN1-D94N-F  | TTCCCTGCTGAATGACCAAGATG    |
| AXIN1-D94N-R  | TGCAGTGA CT CAGCCAC        |
| AXIN1-G98R-F  | TGACCAAGATAGGATAAGCCTGTTC  |
| AXIN1-G98R-R  | TCCAGCAGGGAATGCAGT         |
| AXIN1-G98E-F  | TGACCAAGATGAGATAAGCCTGTTC  |
| AXIN1-S100N-F | AGATGGGATAAACCTGTT CAGGAC  |
| AXIN1-S100N-R | TGGTCATCCAGCAGGGAA         |
| AXIN1-L101P-F | TGGGATAAGCCCGTT CAGGACTTT  |
| AXIN1-L101P-R | TCTTGGTCATCCAGCAGG         |
| AXIN1-R103M-F | AAGCCTGTT CATGACTTTCCTGAAG |
| AXIN1-R103M-R | ATCCCATCTTGGTCATCC         |
| AXIN1-T104N-F | CCTGTT CAGGAATTCCTGAAGC    |
| AXIN1-T104N-R | CTTATCCCATCTTGGTCATC       |
| AXIN1-L106R-F | CAGGACTTTCCGGAAGCAGGAGG    |
| AXIN1-L106R-R | AACAGGCTTATCCCATCTTG       |
| AXIN1-L107I-F | GACTTTCCTGATACAGGAGGGCTG   |

|               |                          |
|---------------|--------------------------|
| AXIN1-K107I-R | CTGAACAGGCTTATCCCATC     |
| AXIN1-Q108H-F | TTTCCTGAAGCATGAGGGCTGTG  |
| AXIN1-Q108H-R | GTCCTGAACAGGCTTATCC      |
| AXIN1-E109D-F | CCTGAAGCAGGATGGCTGTGCCG  |
| AXIN1-E109D-R | AAAGTCCTGAACAGGCTTATCCC  |
| AXIN1-G110A-F | GAAGCAGGAGGCCTGTGCCGACT  |
| AXIN1-G110A-R | AGGAAAGTCCTGAACAGGCTTATC |
| AXIN1-A112T-F | GGAGGGCTGTACCGACTTGCTGG  |
| AXIN1-A112T-R | TGCTTCAGGAAAGTCCTGAACAGG |
| AXIN1_E73K_F2 | GTATGAGCCTAAGGGCAGTGCCT  |
| AXIN1_E73K_R2 | CCCAGGTCCAGATCCGAGCG     |
| AXIN1_E73_R   | CCCAGGTCCAGATCCGAG       |
| AXIN1_G74S_F  | TGAGCCTGAGAGCAGTGCCTC    |
| AXIN1_G74S_R  | TACCCAGGTCCAGATCC        |
| AXIN1_A76T_F  | TGAGGGCAGTACCTCCCCCAC    |
| AXIN1_A76T_R  | GGCTCATACCCAGGTCC        |
| AXIN1_A76V_F  | GAGGGCAGTGTCTCCCCACC     |
| AXIN1_A76V_R  | AGGCTCATACCCAGGTCC       |
| AXIN1_S77F_F  | GGCAGTGCCTTCCCCACCCCA    |
| AXIN1_S77F_R  | CTCAGGCTCATACCCAGGTCC    |
| AXIN1_D113N_F | GGGCTGTGCCAACTTGCTGGA    |
| AXIN1_D113Y_F | GGGCTGTGCCTACTTGCTGGA    |

|                   |                               |
|-------------------|-------------------------------|
| AXIN1_D113_R      | TCCTGCTTCAGGAAAGTCCTG         |
| AXIN1_C121F_F     | TGGTTTGCCTTCACTGGCTTC         |
| AXIN1_C121F_R     | GAAGTCCAGCAAGTCGGC            |
| AXIN1_R125W_F2    | CTGCACTGGCTTCTGGAAGCTGGAGC    |
| AXIN1_R125W_R2    | GCAAACCAGAAGTCCAGCAAGTC       |
| AXIN1_A143D_F     | CTGGCGAGAGACATCTACCGA         |
| AXIN1_A143D_R     | CTTCAGCCTCTTCTCCTCG           |
| AXIN1_E188K_F     | GGCCCAGACCAAATCCAGGC          |
| AXIN1_E188K_R     | TGGTCAAACATGGCAGGATC          |
| AXIN1_L202F_F2    | CTATCCCTCCTTCTTTAAGTCTGATA    |
| AXIN1_L202F_R2    | GTGTTTTCTCCATAGTG             |
| AXIN1_LK202/3QN_F | CCCTCCTCCAAAATTCTGATATTTATTTG |
| AXIN1_LK202/3QN_R | ATAGGTGTTTTCTCCATAG           |
| AXIN1_E209Q_F2    | TATTTATTTGCAATATACGAGGACAGGC  |
| AXIN1_E209Q_R2    | TCAGACTTAAGGAAGGAGGGA         |
| Axin1-I149T-F2    | CCGAAAGTACACTCTTGATAACAATGGCA |
| Axin1-I149T-R2    | TAGATGGCTCTCGCCAGCTT          |
| AXIN1_G69E_F      | CTGGACCTGGAGTATGAGCCTGAG      |
| AXIN1_G69V_F      | CTGGACCTGGTGTATGAGCCTGAG      |
| AXIN1_G69_R       | ATCCGAGCGCCTCGGAGT            |
| AXIN1_P72T_F      | GGGGTATGAGACTGAGGGCAG         |
| AXIN1_P72T_R      | AGGTCCAGATCCGAGCGC            |



|               |                                 |
|---------------|---------------------------------|
| AXIN1_P78S_F  | CAGTGCCTCCTCCACCCCACC           |
| AXIN1_P78S_R  | CCCTCAGGCTCATACCCCAG            |
| AXIN1_A120D_F | TTCTGGTTTACTGCACTGGC            |
| AXIN1_A120D_R | GTCCAGCAAGTCGGCACA              |
| AXIN1_C121S_F | CTGGTTTGCCAGCACTGGCTT           |
| AXIN1_A141T_F | GCTGAAGCTGACGAGAGCCAT           |
| AXIN1_A141T_R | CTCTTCTCCTCGTTCGAG              |
| AXIN1_V156M_F | CAATGGCATCATGTCCCGGCA           |
| AXIN1_V156M_R | TTATCAAGAATGTACTTTCGGTAGATG     |
| AXIN1_K161T_F | CGGCAGACCACGCCAGCCACC           |
| AXIN1_K161T_R | GGACACGATGCCATTGTTATCAAGAATGTAC |
| AXIN1_A185D_F | CATGTTTGACCAGGACCAGACCGAAA      |
| AXIN1_A185V_F | CATGTTTGACCAGGTCAGACCGAAA       |
| AXIN1_A185T_F | CATGTTTGACCAGACCCAGACCGAAA      |
| AXIN1_A185_R  | GCAGGATCGATCAGCTGC              |
| AXIN1_I206M_F | AGTCTGATATGTATTTGGAATATACG      |
| AXIN1_I206M_R | TAAGGAAGGAGGGATAGG              |
| AXIN1_Y207C_F | TCTGATATTTGTTTGGAAATATACGAG     |
| AXIN1_Y207C_R | CTTAAGGAAGGAGGGATAG             |

**c:Primer sequences to insert and identify RGS at the front of AXIN1**

| <b>Primer name</b> | <b>oligos sequences</b>                |
|--------------------|----------------------------------------|
| Flag-RGSdel_fwd    | atatacaggATGAATATCCAAGAGCAGGGTTTCCC    |
| Flag-RGSdel_rev    | tcaagtatggAGATCCGCCCGGGCTCTT           |
| insRGS_fwd         | ggcgcatctCCATACTTGAAGTGGGCTG           |
| insRGS_rev         | ggatattcatCCTCGTATATCCAAATAAATATCAG    |
| pEN-Tmir-NterMycF  | catctcagaagaggatctgAAGACTAATGCGTTTTTCG |
| pEN-Tmir-NterMycR  | agttttgttccatggtggcAGTCGACTGAATTGGTTC  |
| pENTmir-insNMYC_F  | AAGACTAATGCGTTTTTCG                    |
| pENTmir-insNtMYC_R | CAGATCCTCTTCTGAGATG                    |
| FLAG-AXIN1_fwd     | tcatctcagaagaggatctgGGCGGATCTATGAATATC |
| FLAG-AXIN1_rev     | ctcgaaaacgcattagtcttTTAGTCCACCTTCTCCAC |

**d:AXIN1 sgRNAs info**

| <b>Primer name</b> | <b>oligos sequences</b>     |
|--------------------|-----------------------------|
| Axin1-intron4-crF  | CACCGCACGGGGTTGAAAGGTCAC    |
| Axin1-intron4-crR  | AAACGTGACCTTTCAACCCCGTG C   |
| Axin1-intron5-crF  | CACCGAAAACAGCACGACACCGACG   |
| Axin1-intron5-crR  | AAAC CGTCGGTGTGCTGCTGTTTTTC |
| Axin1-R395-crF     | CACCGGAGGAGCTCATCCACCGCC    |
| Axin1-R395-crR     | AAACGGCGGTGGATGAGCTCCTCC    |
| AXIN1-G508-crF     | CACCGCCAAGATGCCAGTGGCACT    |
| AXIN1-G508-crR     | aaacAGTGCCACTGGCATCTTGGC    |
| AXIN1-R723-crF     | CACCGCTGCTTGGAGGGTGCTCGGC   |

|                |                           |
|----------------|---------------------------|
| AXIN1-R723-crR | aaacGCCGAGCACCTCCAAGCAGc  |
| AXIN1-R841-crF | caccGGTGTTTGAGGAGGTTTCGAG |
| AXIN1-R841-crR | aaacCTCGAACCTCCTCAAACACC  |
| JHH7-crF       | caccgAGTCGGCACAGCCCTCCAGC |
| JHH7-crR       | aaacGCTGGAGGGCTGTGCCGACTc |

**e:Primer to identify correctly expected AXIN1 in cell clones**

| Target                                              | Primer           | Oligos sequences      |
|-----------------------------------------------------|------------------|-----------------------|
| R395 truncated clones ,<br>koEXON5, R395P and R395H | AXIN1-Intron4-F1 | GACTGGCCGGACACGAAAA   |
|                                                     | AXIN1-Intron5-R1 | AGAAGTTGAGATCACCCGCTG |
| G508                                                | Axin1-ex6F       | GGCGATCCATCGTCAGGG    |
|                                                     | Axin1-ex6R       | ACACTCTCTGAGTAGCCTCGG |
| R723                                                | Axin1-Intron7F   | TCTGTGGAGGACGTCCATGT  |
|                                                     | Axin1-Intron8R   | AACCACGTAGCTTTCCGACC  |
| R841                                                | Axin1-Intron10F  | CACAGGCCTCCTTCCCATCT  |
|                                                     | Axin1-Intron11R  | TGCTATGAGGAGTGGTCCAG  |

**f:Primer sequences for amplifying genomic exon2 of AXIN1 sequences and cloning into TA vector**

| Target                                          | Primer name      | Oligos sequences              |
|-------------------------------------------------|------------------|-------------------------------|
| AXIN1 exon2                                     | AXIN1-surEX2F    | TGCAGCATTCTGACAGAGCAT         |
|                                                 | AXIN1-surEX2R    | ATGCCCTGAAACGTCCACT           |
| To identify correctly repaired<br>AXIN1 in JHH7 | JHH7-ax1-scF     | GAGACTTCGACGGCCACT            |
|                                                 | Hep3B-AXIN1-scF1 | GCTGGATGACCAAGATGGGAT         |
|                                                 | Hep3B-AXIN1-scR2 | CCAATTCTCCAATTCTTATCGAT<br>GC |

**g:Primer sequences for amplifying AXIN1 cDNA**

| Primer name     | oligos sequences     |
|-----------------|----------------------|
| AXIN1-cdna3F    | AACGACAGCGAGCAGCAGAG |
| AXIN1-cdna6R    | AGCTTGTGACACGGCCCTGG |
| AXIN1-5UTR-F    | GCGCTCATTGTTCTTGACG  |
| Axin1-Intron11R | TGCTATGAGGAGTGGTCCAG |

**h:HDR sequences for generating knockin clone: R395P and R395H**

| Name           | sequences                                                                                  |
|----------------|--------------------------------------------------------------------------------------------|
| WT             | CGCGTGGAGCCTCAGAAGTTCGCGGAGGAGCTCATCCAC <u>CGCCTGG</u> AGGCTGTGCAGCGCACGCGGGAGGCCGAGGAGAAG |
| R395P<br>ssODN | CGCGTGGAGCCTCAGAAGTTCGCGGAGGAGCTCATCCAC <u>CcCCTcG</u> AGGCTGTGCAGCGCACGCGGGAGGCCGAGGAGAAG |
| R395H<br>ssODN | CGCGTGGAGCCTCAGAAGTTCGCGGAGGAGCTCATCCAC <u>CaCCTcG</u> AGGCTGTGCAGCGCACGCGGGAGGCCGAGGAGAAG |

PAM silent: TGG-TcG

**i:Primer sequences used for Qpcr**

| <b>Primer name</b>      | <b>oligos sequences</b> |
|-------------------------|-------------------------|
| <i>AXIN2</i> -qpcr-EX3F | TATCCAGTGATGCGCTGACG    |
| <i>AXIN2</i> -qpcr-EX4R | TTACTGCCACACGATAAGG     |
| <i>AXIN1</i> -qpcr-ex7F | GTGGCGTGCAAAGAAATGC     |
| <i>AXIN1</i> -qpcr-ex8R | TCTGGAGTTTCATGGGGCT     |
| <i>GAPDH</i> -F         | GTCTCCTCTGACTTCAACAGCG  |
| <i>GAPDH</i> -R         | ACCACCCTGTTGCTGTAGCCAA  |
