# Supplementary material for: Analysis of Tumor-Associated AXIN1 Missense Mutations Identifies Variants That Activate β-Catenin Signaling
Source: PubMed Central journal article supplement — Cancer Res. 2024 Feb 15;84(9):1443–59. doi: 10.1158/0008-5472.CAN-23-2268 (PMC11063763; doi:10.1158/0008-5472.can-23-2268), 2024-02-15
Supplement: can-23-2268_supplementary_table_2_suppst2.pdf [file can-23-2268_supplementary_table_2_suppst2.pdf]

### Supplementary Table 2. AXIN1 gnomAD analysis

Germline variants and their frequencies as reported by the gnomAD database

| Germline variant | Reported frequency | reported in cBioPortal |
|------------------|--------------------|------------------------|
| P263T            | 1.45e-4            | 1                      |
| D495E            | 5.92e-3            | 1                      |
| A526V            | 1.02e-3            | 1                      |
| R841Q            | 8.58e-3            | 0                      |
