# Supplementary material for: Analysis of Tumor-Associated AXIN1 Missense Mutations Identifies Variants That Activate β-Catenin Signaling
Source: PubMed Central journal article supplement — Cancer Res. 2024 Feb 15;84(9):1443–59. doi: 10.1158/0008-5472.CAN-23-2268 (PMC11063763; doi:10.1158/0008-5472.can-23-2268), 2024-02-15
Supplement: can-23-2268_supplementary_table_4_suppst4.pdf [file can-23-2268_supplementary_table_4_suppst4.pdf]

**Supplementary Table 4. Overview of the interactions at the interface between AXIN1 and  $\beta$ -catenin for the mutated amino acids and their predicted effects.**

| <b>Amino acid change in AXIN1</b> | <b>Located at interface</b>              | <b>Original interaction of side chain</b>                                  | <b>Predicted effect of amino acid change</b>                                            | <b>Expected effect on complex formation</b> |
|-----------------------------------|------------------------------------------|----------------------------------------------------------------------------|-----------------------------------------------------------------------------------------|---------------------------------------------|
| E464K and E464D                   | No                                       | None, sticks into solution                                                 | Side chain remains polar, no effect on solubility                                       | None                                        |
| N466Y                             | No, but makes intrahelical hydrogen bond | H bond between side chain oxygen and backbone nitrogen of adjacent residue | Loss of intrahelical hydrogen bond and possibly local destabilization of the helix      | Possibly weaker complex formation           |
| Q476K                             | No                                       | None, sticks into solution                                                 | Side chain remains polar, no effect on solubility                                       | None                                        |
| V478G                             | Yes                                      | Hydrophobic patch formation at interface                                   | Loss of hydrophobic effect and increased local flexibility due to removal of side chain | Weaker complex formation                    |
