# Supplementary material for: Analysis of Tumor-Associated AXIN1 Missense Mutations Identifies Variants That Activate β-Catenin Signaling
Source: PubMed Central journal article supplement — Cancer Res. 2024 Feb 15;84(9):1443–59. doi: 10.1158/0008-5472.CAN-23-2268 (PMC11063763; doi:10.1158/0008-5472.can-23-2268), 2024-02-15
Supplement: can-23-2268_supplementary_table_5_suppst5.pdf [file can-23-2268_supplementary_table_5_suppst5.pdf]

**Supplementary Table 5. Reported missense mutations in D65\_S228 domain of AXIN1.**

| Amino acid position in AXIN1 | Nucleotide change                 | Amino acid change       | COSMIC and TCGA ID number | Count | Consurf score | identical to AXIN2 |
|------------------------------|-----------------------------------|-------------------------|---------------------------|-------|---------------|--------------------|
| <a href="#">69</a>           | <a href="#">c.206G&gt;A</a>       | <a href="#">p.G69E</a>  | COSM5620341               | 1     | 9             | ID                 |
| <a href="#">69</a>           | <a href="#">c.206G&gt;T</a>       | <a href="#">p.G69V</a>  | COSM7663689               | 1     | 9             | ID                 |
| <a href="#">72</a>           | <a href="#">c.214C&gt;A</a>       | <a href="#">p.P72T</a>  | COSM4995659               | 1     | 9             | ID                 |
| <a href="#">73</a>           | <a href="#">c.217G&gt;A</a>       | <a href="#">p.E73K</a>  | COSM93924                 | 1     | 9             | ID                 |
| <a href="#">73</a>           | <a href="#">c.217G&gt;C</a>       | <a href="#">p.E73Q</a>  | COSM7694173               | 8     | 9             | ID                 |
| <a href="#">74</a>           | <a href="#">c.220G&gt;A</a>       | <a href="#">p.G74S</a>  | COSM6965088               | 2     | 8             | ID                 |
| <a href="#">75</a>           | <a href="#">c.223A&gt;G</a>       | <a href="#">p.S75G</a>  | COSM143840                | 2     | 9             | x                  |
| <a href="#">75</a>           | <a href="#">c.224G&gt;A</a>       | <a href="#">p.S75N</a>  | COSM143871                | 1     | 9             | x                  |
| <a href="#">76</a>           | <a href="#">c.226G&gt;A</a>       | <a href="#">p.A76T</a>  | COSM143826                | 4     | 9             | ID                 |
| <a href="#">76</a>           | <a href="#">c.227C&gt;T</a>       | <a href="#">p.A76V</a>  | COSM143838                | 3     | 9             | ID                 |
| <a href="#">77</a>           | <a href="#">c.230C&gt;T</a>       | <a href="#">p.S77F</a>  | COSM143852                | 3     | 9             | ID                 |
| <a href="#">78</a>           | <a href="#">c.232C&gt;T</a>       | <a href="#">p.P78S</a>  | COSM143856                | 1     | 9             | ID                 |
| <a href="#">79</a>           | <a href="#">c.236C&gt;T</a>       | <a href="#">p.T79I</a>  | COSM143853                | 4     | 9             | x                  |
| <a href="#">79</a>           | <a href="#">c.236_237delinsTT</a> | <a href="#">p.T79I</a>  | COSM9473387               | 1     | 9             | x                  |
| <a href="#">80</a>           | <a href="#">c.238C&gt;A</a>       | <a href="#">p.P80T</a>  | COSM8199893               | 1     | 9             | x                  |
| <a href="#">87</a>           | <a href="#">c.259G&gt;A</a>       | <a href="#">p.E87K</a>  | COSM143839                | 1     | 9             | x                  |
| <a href="#">88</a>           | <a href="#">c.262T&gt;C</a>       | <a href="#">p.S88P</a>  | COSM5568943               | 1     | 9             | ID                 |
| <a href="#">90</a>           | <a href="#">c.268C&gt;T</a>       | <a href="#">p.H90Y</a>  | COSM1678728               | 1     | 9             | ID                 |
| <a href="#">91</a>           | <a href="#">c.272_273delinsTT</a> | <a href="#">p.S91F</a>  | COSM4565919               | 1     | 9             | ID                 |
| <a href="#">94</a>           | <a href="#">c.280G&gt;A</a>       | <a href="#">p.D94N</a>  | COSM9359320               | 1     | 9             | x                  |
| <a href="#">98</a>           | <a href="#">c.292G&gt;A</a>       | <a href="#">p.G98R</a>  | COSM3727222               | 1     | 9             | ID                 |
| <a href="#">98</a>           | <a href="#">c.293G&gt;A</a>       | <a href="#">p.G98E</a>  | COSM6908745               | 1     | 9             | ID                 |
| <a href="#">100</a>          | <a href="#">c.299G&gt;A</a>       | <a href="#">p.S100N</a> | COSM9494433               | 2     | 4             | x                  |
| <a href="#">101</a>          | <a href="#">c.302T&gt;C</a>       | <a href="#">p.L101P</a> | COSM143744                | 1     | 9             | ID                 |
| <a href="#">103</a>          | <a href="#">c.308G&gt;T</a>       | <a href="#">p.R103M</a> | COSM143743                | 1     | 7             | ID                 |
| <a href="#">104</a>          |                                   | <i>T104N</i>            | TCGA-2G-AAGA-01           |       | 8             |                    |
| <a href="#">106</a>          | <a href="#">c.317T&gt;G</a>       | <a href="#">p.L106R</a> | COSM142850                | 1     | 8             | ID                 |
| <a href="#">107</a>          | <a href="#">c.320_321delinsTA</a> | <a href="#">p.K107I</a> | COSM290940                | 1     | 4             | x                  |
| <a href="#">108</a>          | <a href="#">c.324G&gt;T</a>       | <a href="#">p.Q108H</a> | COSM143918                | 1     | 8             | x                  |
| <a href="#">109</a>          | <a href="#">c.327G&gt;T</a>       | <a href="#">p.E109D</a> | COSM8794541               | 1     | 9             | ID                 |
| <a href="#">110</a>          | <a href="#">c.329G&gt;C</a>       | <a href="#">p.G110A</a> | COSM7357165               | 1     | 1             | x                  |
| <a href="#">112</a>          | <a href="#">c.334G&gt;A</a>       | <a href="#">p.A112T</a> | COSM8913100               | 1     | 6             | x                  |
| <a href="#">113</a>          | <a href="#">c.337G&gt;A</a>       | <a href="#">p.D113N</a> | COSM3420985               | 1     | 9             | ID                 |
| <a href="#">113</a>          | <a href="#">c.337G&gt;T</a>       | <a href="#">p.D113Y</a> | COSM5822630               | 1     | 9             | ID                 |
| <a href="#">120</a>          | <a href="#">c.359C&gt;A</a>       | <a href="#">p.A120D</a> | COSM8393909               | 1     | 9             | ID                 |
| <a href="#">121</a>          | <a href="#">c.361T&gt;A</a>       | <a href="#">p.C121S</a> | COSM6982534               | 1     | 9             | ID                 |
| <a href="#">121</a>          | <a href="#">c.362G&gt;T</a>       | <a href="#">p.C121F</a> | COSM133748                | 2     | 9             | ID                 |
| <a href="#">122</a>          | <a href="#">c.364A&gt;G</a>       | <a href="#">p.T122A</a> | COSM143746                | 1     | 8             | x                  |
| <a href="#">122</a>          | <a href="#">c.365C&gt;G</a>       | <a href="#">p.T122S</a> | COSM9496131               | 1     | 8             | x                  |
| <a href="#">125</a>          | <a href="#">c.373A&gt;T</a>       | <a href="#">p.R125W</a> | COSM1729092               | 1     | 9             | ID                 |
| <a href="#">132</a>          | <a href="#">c.395C&gt;G</a>       | <a href="#">p.S132W</a> | COSM9064898               | 1     | 2             | x                  |
| <a href="#">133</a>          | <a href="#">c.398A&gt;G</a>       | <a href="#">p.N133S</a> | COSM4579034               | 1     | 8             | x                  |
| <a href="#">134</a>          | <a href="#">c.400G&gt;A</a>       | <a href="#">p.E134K</a> | COSM143855                | 1     | 8             | x                  |
| <a href="#">137</a>          | <a href="#">c.410G&gt;A</a>       | <a href="#">p.R137K</a> | COSM143878                | 1     | 7             | x                  |

|                     |                                      |                                     |                 |   |   |    |
|---------------------|--------------------------------------|-------------------------------------|-----------------|---|---|----|
| <a href="#">139</a> | <a href="#">c.417G&gt;T</a>          | <a href="#">p.K139N</a>             | COSM970617      | 1 | 8 | x  |
| <a href="#">141</a> | <a href="#">c.421G&gt;A</a>          | <a href="#">p.A141T</a>             | COSM6225693     | 1 | 9 | ID |
| <a href="#">143</a> | <a href="#">c.428C&gt;A</a>          | <a href="#">p.A143D</a>             | COSM4607640     | 2 | 9 | ID |
| <a href="#">146</a> | <a href="#">c.437G&gt;A</a>          | <a href="#">p.R146Q</a>             | COSM970616      | 7 | 6 | x  |
| <a href="#">147</a> | <a href="#">c.441G&gt;T</a>          | <a href="#">p.K147N</a>             | COSM5054885     | 1 | 7 | x  |
| <a href="#">149</a> | <a href="#">c.446T&gt;C</a>          | <a href="#">p.I149T</a>             | COSM435240      | 1 | 8 | ID |
| <a href="#">152</a> | <a href="#">c.455A&gt;C</a>          | <a href="#">p.N152T</a>             | COSM6609029     | 1 | 1 | ID |
| <a href="#">156</a> | <a href="#">c.466G&gt;A</a>          | <a href="#">p.V156M</a>             | COSM5850898     | 1 | 9 | ID |
| <a href="#">158</a> | <a href="#">c.472C&gt;T</a>          | <a href="#">p.R158W</a>             | COSM8837387     | 1 | 8 | x  |
| <a href="#">161</a> | <a href="#">c.482A&gt;C</a>          | <a href="#">p.K161T</a>             | COSM1184278     | 1 | 9 | ID |
| <a href="#">166</a> | <a href="#">c.498C&gt;A</a>          | <a href="#">p.S166R</a>             | COSM5005583     | 2 | 8 | x  |
| <a href="#">170</a> | <a href="#">c.509G&gt;A</a>          | <a href="#">p.G170D</a>             | COSM9837233     | 1 | 8 | x  |
| <a href="#">172</a> | <a href="#">c.513_514inv</a>         | <a href="#">p.I172V</a>             | COSM9837232     | 1 | 7 | ID |
| <a href="#">173</a> | <a href="#">c.519G&gt;A</a>          | <a href="#">p.M173I</a>             | COSM143889      | 1 | 1 | x  |
| <a href="#">176</a> | <a href="#">c.527T&gt;A</a>          | <a href="#">p.L176Q</a>             | COSM9837231     | 1 | 5 | x  |
| <a href="#">177</a> | <a href="#">c.529A&gt;T</a>          | <a href="#">p.I177F</a>             | COSM6913901     | 1 | 7 | ID |
| <a href="#">181</a> | <a href="#">c.543G&gt;A</a>          | <a href="#">p.M181I</a>             | COSM5990560     | 1 | 8 | ID |
| <a href="#">185</a> | <a href="#">c.554C&gt;A</a>          | <a href="#">p.A185D</a>             | COSM5811968     | 1 | 9 | ID |
| <a href="#">185</a> | <a href="#">c.554C&gt;T</a>          | <a href="#">p.A185V</a>             | COSM9886522     | 1 | 9 | ID |
| 185                 |                                      | <i>p.A185T</i>                      | TCGA-AP-A1DK-01 |   | 9 | ID |
| <a href="#">188</a> | <a href="#">c.562G&gt;A</a>          | <a href="#">p.E188K</a>             | COSM4060722     | 2 | 9 | ID |
| <a href="#">191</a> | <a href="#">c.571G&gt;A</a>          | <a href="#">p.A191T</a>             | COSM5990559     | 1 | 1 | x  |
| <a href="#">192</a> | <a href="#">c.575C&gt;G</a>          | <a href="#">p.T192S</a>             | COSM7319071     | 1 | 6 | x  |
| <a href="#">193</a> | <a href="#">c.578T&gt;A</a>          | <a href="#">p.M193K</a>             | COSM4910337     | 1 | 5 | ID |
| <a href="#">199</a> | <a href="#">c.595C&gt;T</a>          | <a href="#">p.P199S</a>             | COSM7960470     | 2 | 9 | x  |
| <a href="#">199</a> | <a href="#">c.596C&gt;T</a>          | <a href="#">p.P199L</a>             | COSM7960500     | 1 | 9 | x  |
| <a href="#">200</a> | <a href="#">c.599C&gt;G</a>          | <a href="#">p.S200C</a>             | COSM7677279     | 1 | 4 | x  |
| <a href="#">200</a> | <a href="#">c.599C&gt;T</a>          | <a href="#">p.S200F</a>             | COSM5990558     | 1 | 4 | x  |
| <a href="#">202</a> | <a href="#">c.604C&gt;T</a>          | <a href="#">p.L202F</a>             | COSM6976660     | 1 | 9 | ID |
| <a href="#">202</a> | <a href="#">c.605T&gt;C</a>          | <a href="#">p.L202P</a>             | COSM3727796     | 1 | 9 | ID |
| <a href="#">202</a> | <a href="#">c.605_609delinsAAAAT</a> | <a href="#">p.L202_K203delinsQN</a> | COSM6967623     | 1 | 9 | ID |
| <a href="#">205</a> | <a href="#">c.613G&gt;C</a>          | <a href="#">p.D205H</a>             | COSM9530177     | 1 | 8 | ID |
| <a href="#">206</a> | <a href="#">c.618T&gt;G</a>          | <a href="#">p.I206M</a>             | COSM1377725     | 1 | 9 | ID |
| <a href="#">207</a> | <a href="#">c.620A&gt;G</a>          | <a href="#">p.Y207C</a>             | COSM4968577     | 1 | 9 | ID |
| <a href="#">209</a> | <a href="#">c.625G&gt;C</a>          | <a href="#">p.E209Q</a>             | COSM6955693     | 2 | 9 | ID |
| <a href="#">213</a> | <a href="#">c.638C&gt;T</a>          | <a href="#">p.T213I</a>             | COSM143872      | 2 | 7 | x  |
| <a href="#">215</a> | <a href="#">c.644C&gt;T</a>          | <a href="#">p.S215L</a>             | COSM133743      | 1 | 4 | x  |
| <a href="#">218</a> | <a href="#">c.652C&gt;T</a>          | <a href="#">p.P218S</a>             | COSM133744      | 3 | 9 | x  |
| <a href="#">218</a> | <a href="#">c.653_654delinsTT</a>    | <a href="#">p.P218L</a>             | COSM9473208     | 1 | 9 | x  |
| <a href="#">224</a> | <a href="#">c.672G&gt;C</a>          | <a href="#">p.Q224H</a>             | COSM3817967     | 1 | 7 | x  |
| <a href="#">226</a> | <a href="#">c.677C&gt;G</a>          | <a href="#">p.S226C</a>             | COSM143799      | 1 | 9 | x  |
| <a href="#">228</a> | <a href="#">c.683C&gt;T</a>          | <a href="#">p.S228L</a>             | COSM143880      | 1 | 8 | x  |
