# Supplementary material for: Analysis of Tumor-Associated AXIN1 Missense Mutations Identifies Variants That Activate β-Catenin Signaling
Source: PubMed Central journal article supplement — Cancer Res. 2024 Feb 15;84(9):1443–59. doi: 10.1158/0008-5472.CAN-23-2268 (PMC11063763; doi:10.1158/0008-5472.can-23-2268), 2024-02-15
Supplement: can-23-2268_supplementary_table_6_suppst6.pdf [file can-23-2268_supplementary_table_6_suppst6.pdf]

**Supplementary Table 6. Overview of the interactions at the interface between AXIN1 and APC for the mutated amino acids and their predicted effects.**

| Amino acid change in AXIN1 | Number in structure (37 aa register shift) | Located at interface                                                                  | Original interaction of side chain                                                                           | Predicted effect of amino acid change                                                                         | Expected effect on AXIN stability and complex formation                                                                                  |
|----------------------------|--------------------------------------------|---------------------------------------------------------------------------------------|--------------------------------------------------------------------------------------------------------------|---------------------------------------------------------------------------------------------------------------|------------------------------------------------------------------------------------------------------------------------------------------|
| S88P                       | S125                                       | No                                                                                    | Surface exposed polar serine in loop                                                                         | Proline may be properly accommodated in loop                                                                  | none                                                                                                                                     |
| H90Y                       | H127                                       | No                                                                                    | Surface exposed polar histidine in $\alpha$ -helix                                                           | Polar tyrosine side chain can be easily accommodated,                                                         | none                                                                                                                                     |
| S91F                       | S128                                       | No                                                                                    | Surface exposed polar serine in $\alpha$ -helix                                                              | Polar serine gets replaced by non-polar phenylalanine, space enough                                           | Maybe little lower solubility of AXIN due to hydrophobic side chain at surface. No direct effect on complex                              |
| D94N                       | D131                                       | No, very close, but no interaction                                                    | Surface exposed aspartate on helix, but makes no interactions with any other residue within AXIN or with APC | Conservative mutation to asparagine, same shape, still polar                                                  | none                                                                                                                                     |
| G98R<br>G98E               | G135                                       | No, not the glycine, but residues on the other side of the helix are at the interface | Densely packed hydrophobic core with Trp122 and Leu129                                                       | Serious steric clashes with Trp122 and Leu129, will not fit, both for Arg and Glu mutations                   | Yes, local restructuring of AXIN1 to accommodate new sidechain, destabilization and reduced complex formation because close to interface |
| S100N                      | S137                                       | no                                                                                    | Surface exposed polar serine on helix, no interactions with other residues                                   | Mutation to polar residue at surface                                                                          | None                                                                                                                                     |
| L101P                      | L138                                       | No, not the leucine, but residues on the other side of the helix are at the interface | Partially exposed leucine side chain makes favorable vdWaals contacts with Trp122, Tyr247 and Phe238.        | Mutation to proline will locally distort the geometry of the $\alpha$ -helix                                  | Yes, local structural changes will destabilize AXIN1                                                                                     |
| R103M                      | R140                                       | No, but right next to it                                                              | Surface-exposed bidentate salt-bridge with Asp153                                                            | Loss of salt-bridge                                                                                           | Possible slight destabilization of AXIN1, no direct effect on complex                                                                    |
| T104N                      | T141                                       | No                                                                                    | Surface exposed threonine on helix, no interactions                                                          | None, asparagine still polar and can be accommodated on surface                                               | None                                                                                                                                     |
| L106R                      | L143                                       | No                                                                                    | Completely buried in hydrophobic core of AXIN1                                                               | Arg will not fit (different shape and size) and positive charge is energetically unfavorable at this location | Large destabilization incorrect folding of AXIN1 protein, interface will probably not form, so large effect on complex formation         |
